# Supplementary material for: Ancient genome-wide analyses infer kinship structure in an Early Medieval Alemannic graveyard
Source: PubMed Central journal article supplement — Sci Adv. 2018 Sep 5;4(9):eaao1262. doi: 10.1126/sciadv.aao1262 (PMC6124919; doi:10.1126/sciadv.aao1262), 2018-09-05
Supplement: aao1262_SM.pdf [file aao1262_SM.pdf]

## Supplementary Materials for

### **Ancient genome-wide analyses infer kinship structure in an Early Medieval Alemannic graveyard**

Niall O'Sullivan\*, Cosimo Posth, Valentina Coia, Verena J. Schuenemann, T. Douglas Price, Joachim Wahl, Ron Pinhasi, Albert Zink\*, Johannes Krause\*, Frank Maixner\*

\*Corresponding author. Email: niall.o-sullivan@ucdconnect.ie (N.O.); krause@shh.mpg.de (J.K.); albert.zink@eurac.edu (A.Z.); frank.maixner@eurac.edu (F.M.)

Published 5 September 2018, *Sci. Adv.* 4, eaao1262 (2018)

DOI: 10.1126/sciadv.aao1262

#### **The PDF file includes:**

Supplementary Materials and methods

Fig. S1. Photographs of burial goods with most specific cultural identifying markers.

Fig. S2. Isotope  $^{86}\text{Sr}/^{87}\text{Sr}$  and  $\delta^{18}\text{O}$  values for enamel from teeth.

Fig. S3. Overlaying shotgun and mtDNA deamination plots from mapDamage quantification against the reference genome.

Fig. S4. Genetic sex estimates from genome-wide capture.

Fig. S5. Admixture estimates for west Eurasians, Niederstotzingen, and selected ancient individuals.

Fig. S6. F3 outgroup statistics for Niederstotzingen 1 using Mbuti as an outgroup.

Fig. S7. F3 outgroup statistics for Niederstotzingen 3A using Mbuti as an outgroup.

Fig. S8. F3 outgroup statistics for Niederstotzingen 3B using Mbuti as an outgroup.

Fig. S9. F3 outgroup statistics for Niederstotzingen 3C using Mbuti as an outgroup.

Fig. S10. F3 outgroup statistics for Niederstotzingen 6 using Mbuti as an outgroup.

Fig. S11. F3 outgroup statistics for Niederstotzingen 9 using Mbuti as an outgroup.

Fig. S12. F3 outgroup statistics for Niederstotzingen 12B using Mbuti as an outgroup.

Fig. S13. F3 outgroup statistics for Niederstotzingen 12C using Mbuti as an outgroup.

Table S1. PCR-based haplotyping of DNA extracts from previous study.

Table S2. Archeological context and isotopes.

Table S3. Shotgun sequencing output and mapping data.

Table S4. mtDNA capture sequencing output data and mapping.

Table S5. 1240K sequencing output data and mapping.

Table S6. Schmutzi estimation of mtDNA contamination.

Table S7. ANGSD X chromosome contamination estimate on 1240K libraries.

Table S8. Haplogroups and private mutations for each mtDNA capture (phylotree 17).

Table S9. Complete list of NRY haplogroups with identifying ISOGG markers for 1240K capture sequences.

Table S10. Sex estimates from shotgun and genome-wide capture data.

Table S11. Sex estimates from shotgun data based on Rx values.

Table S12. Admixture CV error values for each component and individual.

Table S13. Shotgun reads with PMDtools threshold 3 filtered and skoglund sex estimate of filtered reads.

Table S14. Haplogroup calling of selected individuals before and after PMD (threshold 3) filtering.

Table S15. READ pairwise kinship-based estimate.

Table S16. Pairwise estimate of kinship and coefficient of relatedness.

References (52–58)

## Supplementary Materials and methods

### 1. Historical background of Alemanni and Niederstotzingen

Germanic groups started to form permanent settlements in the Limes-Hinterland in the late 3<sup>rd</sup> and early 4<sup>th</sup> century AD. These groups purportedly originated from Elbgermanic region between the Baltic Sea and Thüringen forest to form the Alemannen tribe (circa 300 AD) under Roman patronage. From 350 AD the Alemanni began to rebel against Roman military rule and the power of warlords grew. Between 360 and 430 AD settled lifestyle and mobile war parties co-existed across Alemannia (1).

In the middle of the 5<sup>th</sup> century AD clear changes in the burial practices and artefacts are observed in the Alemannic archaeological record. These changes possibly reflected several independent migration waves and different political and military strategy. The Alemanni abandon old traditions and integrate new trades. From *circa* 480 AD burials are West-East orientated (previously North-South) and multiple burials appear, indicating proselytization (4). Horses are buried in the same graveyards as humans and precious artefacts are buried along with individuals that bare resemblance to artefacts from Northern Bohemia, Vinarici and the Middle Danube region (Moravia, Slovakia, and Northern Hungary). Artefacts typical of the Mediterranean and Near East indicate contacts of the Alemanni with the Byzantines. This supports the notion of migration and integration of new foreign groups.

These migrations began around 451/455 AD after the death of Attila (2). The power of the Huns decreased in the Danube region and Germanic tribes migrated away. Compact political structures were formed by increasingly centralized settlements, where political elites lived, resulting in closer social connections between heterogeneous Alemanni. Rank in this society was based on the size of one's retinue (*Personenverbandstaat*) and possession of valuable materials rather than fixed territorial control (4). Transition of power was not based on inheritance either, but could be passed between high-ranking individuals in a group. This is reflected in the archaeological record of Alemanni and other Germanic Migration-period groups by the observation of burials with combinations of family and unrelated people living together in so-called familia (30).

Clovis I defeated the Alemanni in 497 AD and established Alemannia as an administrative area under the overlordship of the Merovingian Kingdom and Frankish Dukes (4). In the following three centuries, naming of groups became more rigid, along with other Germanic groups including Thuringians, Bavarians and Burgundians (3). This brought to an end the Germanic migrations in the Migration-period. In the following three centuries the Merovingians subjected Alemannia to political, economic and social changes, including Christianisation. Around 600 AD powerful families differentiated and became nobles. These nobles bestowed artefacts and territory to individuals that were indicative of rank and purpose and were subsequently buried with those people.

### 2. Historical designations

Tacitus first described the Suebi in the 1<sup>st</sup> century AD as a homogenous confederation of barbarians across Western Germany. Cassius Dio first documented the Alemanni in 213 AD along

the Limes frontier in the Upper Rhine region (1, 2). These names were probably designations by Romans to classify an array of heterogeneous Germanic groups at the frontiers of the Empire. Accounts of Suebi and Alemanni differ throughout the centuries, some accounts designate them as distinct whereas others use the terms interchangeably. Alemanni have periods of stark geographic discontinuity in historical accounts. For example, in the early 4<sup>th</sup> century AD they disappear from records after losing conflicts against the Romans only to reappear decades later. In the mid-4<sup>th</sup> century AD, Armanius divides the Alemanni into Bucinobantes and Lentienses. But these appear to be geographic rather than ethnic distinctions (1, 2).

Interchangeability of names with other Germanic groups is common in the historical accounts. Gregory of Tours mid-6<sup>th</sup> century historian writes that Suebi and Alemanni are one people. Yet earlier accounts distinguished the two. The Suebi came to the Upper Rhine around 400 AD, and a union of the two groups may have occurred between 454 and 474 AD. The union of Suebi and Alemanni into Alemanni may have been against the Romans or rival Germanic groups such as the Franks.

### **3. Archaeological context, PCR based analysis, osteological description and stable isotopes**

Previous to this study, archaeologists excavated twelve graves and recovered the remains of thirteen individuals and a rich assemblage of artefacts that dated the site to the beginning of the 7<sup>th</sup> century A.D. (6, 8). These artefacts and the presence of swords buried with all adult males show evidence of a Warrior class that were in contact with Lombards, Franks and Byzantines (fig. S1 A-D). The burial is located approximately at the site of a Roman crossroads, which was still maintained at the time (Fig. 1). The rich assemblage of grave goods at the burial indicates that these individuals were associated to a military outpost guarding an important land route. Also discovered at the site were horse burials and equestrian gear, inferring that the individuals were highly mobile. Belt inscriptions and style dated the burial to *circa* 580 to 630 AD (8).

**Grave 1:** Lance, shield, saex, double-edged-sword.

**Grave 2:** Saex.

**Grave 3A:** Lance, shield, saex, double-edged-sword, arrows, and bridle with silver pressed sheet metal fittings of Byzantine ornamentation.

**Grave 3B:** Lance, shield, saex, double-edged-sword.

**Grave 3C:** Lance, shield handle, saex, double-edged-sword.

**Grave 4:** Belt, pearls and golden ring.

**Grave 5:** Belt ornamentation dated to beginning of 7th century

**Grave 6:** Double-edged-sword, belt and bridle originating from Lombard Italy. Belt ornamentation dated to beginning of 7th century.

**Grave 7:** Beads with no human remains. Evidence of being plundered.

**Grave 8:** Horse remains.

**Grave 9:** Lance, shield, shield handle, saex, double-edged-ring-sword. The ring-sword has a silver pommel and bead golden decorative button, and the lance engravings indicate Frankish origin.

**Grave 10:** Double-edged-sword.

**Grave 11:** Remains of two horses.

**Grave 12a:** Shield, shield handle, double-edged-sword, lamella armour Byzantine style.

**Grave 12B:** Double-edged-sword, lance, shield, lamella helmet Byzantine style.

**Grave 12C:** Double-edged-sword.

Previous studies PCR based studies retrieved the genetic sex for some of the individuals. Also the hypervariable region of the mitochondrial genomes were partly reconstructed which show the haplogroup for some of the individuals (table S1).

Age-at-death estimates of individuals show a combination of three children and ten adults at the site (table S2). Strontium isotope ( $^{87}\text{Sr}/^{86}\text{Sr}$ ) and Oxygen ( $\delta^{18}\text{O}$ ) isotope analysis (estimated in previous study) show that all individuals had local geographic origin with the exception of 3B and 10, who have 'non-local' signals (fig. S2) (8). The  $\delta^{18}\text{O}$  support a childhood spent in a higher altitude region such as the Alps. Together  $\delta^{13}\text{C}$  and  $\delta^{18}\text{O}$  values estimate that all consumed a primarily terrestrial diet and thus do not support any significant period of settlement close to the sea.

#### **4. Next generation sequencing and analysis**

##### **Preparation of DNA and sequencing**

Teeth were sampled from each individual and dentine was separated. This was sterilized with bleach solution and UV-light in a clean room at the EURAC Institute for Mummies and the Iceman Bolzano, Italy. Silica based extraction was used to extract DNA from ~250mg of milled dentine (31). Double-stranded Illumina libraries were prepared using the protocol for ancient DNA (aDNA) and double indexed (32, 33). DNA extracts were sent to the aDNA facility at the University of Tübingen, Germany for library preparation, and subsequent shotgun sequencing and mitochondrial DNA (mtDNA) probe capture (52). Prior to nuclear SNP capture (1240K) (24), library preparation incorporated half-UDG (Uracil-DNA Glycosylase) treatment of extracts to reduce lesions to DNA caused by time dependent deamination of aDNA (34). Where there were multiple genomic libraries from the same individual, the library with the highest percentage of endogenous DNA was chosen for nuclear capture (table S3). Half-UDG libraries were transferred to the Institute for Human History at the Max Planck, Jena, Germany for 1240K capture and sequencing. 1240K capture enriched libraries for 1.24 million SNPs.

Shotgun and mtDNA capture libraries were sequenced on an Illumina HiSeq 2500 (75bp paired-end sequencing kits). The 1240K captured libraries were multiplexed and sequenced on an Illumina HiSeq 4000 and NextSeq (75bp paired-end sequencing kits).

##### **Raw data processing and quality control**

Raw paired end data processing and quality control followed the pipeline of EAGER (37). Clip&Merge had a minimal fragment length of 30bp after trimming removed 2bp from 5' and 3' termini to reduce residual deamination. BWA seeding was disabled (-l 1000) for greater inclusion of deaminated sequences (53). Reads were mapped to the human genome (Build Hg19) (39) for shotgun and autosomal capture. The mtDNA capture was mapped to the mt reference (rCRS) (40). Samtools mpileup (54) with Pileupcaller (<https://github.com/stschiff/sequenceTools/tree/master/src-pileupCaller>) were used to genotype mapped reads to EIGENSTRAT format. For all downstream analyses, the mapping quality and base quality threshold for downstream analysis were > 30. Summary of EAGER outputs show that shotgun data have considerable variety of reads mapping to the target loci from less than 1% to over 75% endogenous content (table S3). This indicates that DNA preservation is considerably varied between the individuals and even in the samples taken from the same individual. The EAGER output of the mtDNA and 1240K capture show enrichment of percentage reads mapping to target loci (table S4 and S5). For 1240K capture, individuals 1, 3A,

3B, 3C, 6, 9, 12B and 12C had sufficient enrichment for downstream population genetics analysis. PMDtools was applied to mtDNA capture and shotgun data (non-UDG treated) to filter potential modern contamination and serve as another level of authentication (22) (table S13 and S14).

### **Contamination estimates and authentication**

mtDNA contamination was analysed using Schmutzi (42), to estimate the level of contaminating reads in the mtDNA captured sequenced libraries. The data show that mtDNA capture contamination was low except for individuals 2, 10 and 12a having contamination above 5% (table S6).

ANGSD (43) estimated the autosomal contamination based on mismatches in males at the X-chromosome in 1240K libraries. The data show individuals with sufficient X-chromosome coverage have low contamination in the nuclear DNA (table S7).

The presence of deamination lesions at 5' and 3' ends in non-UDG treated libraries (shotgun and mtDNA capture) was quantified with MapDamage (41) to provide further evidence of the presence of endogenous aDNA. The average deamination rate is 12% at 5' termini for shotgun libraries; two libraries show low deamination at or below 5% (2, 5 and 12b) suggesting presence of modern contamination. However, mtDNA capture has an average deamination of 22% at 5' termini, for individuals 2 and 12b deamination rates increase above 25% post-enrichment, suggesting that ancient sequences are also present in rates that are appreciable enough to be effectively filtered (fig. S3). PMDtools (threshold 3) filtration of contaminated mtDNA captured libraries showed that 2 and 5 had consistent haplogroups, while 12A was less derived owing to reduced coverage (table S14).

### **Uniparental markers and sex estimation**

Consensus mitogenome sequences were created with log2fasta (quality > 20) (42). IGVtools was used to visualise bam files and validate haplotypes at contaminated or low coverage loci (19). The haplotypes and haplogroups of the mitogenomes were identified using Haplofind and phylotree17 (table S8) (44, 45).

NRY genotypes were stringently called with ANGSD to avoid potential erroneous calling due to miscoding or low coverage. C->T and G->A transitions with <2X coverage were disqualified due to potential sequence error or residual deamination lesions. The NRY haplotypes were identified by calling genotypes that overlapped with the 1240K array and the ISOGG database 11.349 (<http://www.isogg.org/tree>). Haplotyping was assisted with yhaplo tool (55) (table S9). The partial haplogroups of ten individuals are called from the 1240K. Individuals 10 and 12a had insufficient coverage for popgen analysis but had enough to identify NRY haplotypes of the R1 lineage. Individuals 1, 3A and 9 have matching haplogroups, but at their most derived loci have different haplotypes. This does not exclude paternal relation, as R1 SNPs are consistent across the same ancestral tree and incomplete coverage on the Y-chromosome tree is observed for NRY haplotypes for the entire cohort.

To identify the genetic sex, shotgun data were analysed with a python script for genetic based estimates of sex chromosome reads X and Y (47). The normalised proportion of X chromosome reads to autosomal reads was used to help estimate sex in extremely low covered shotgun

libraries (23) (table S11). Sex estimates were also made from autosomal captures which were based on the ratio of captured reads overlapping with 1240K autosomal SNPs to the sex chromosomes, this is a visual guide and not a statistically significant estimate of sex (table S10 and S11 and fig. S4). Shotgun data show that individuals 2, 5, 10 and 12a had statistically insignificant estimates of sex but are consistent with maleness. PMDtools threshold 3 was applied to investigate if sex estimates were consistent after filtering (table S13). The PMD filtered shotgun data has less statistical robustness, individual 2 and 5's sex cannot be estimated from PMD filtered data as they lose nearly all sex chromosomal reads. Individuals 3A, 3C and 12B filtered libraries lose statistical significance for sex estimates. All individuals have relatively high Y chromosome SNP coverage in 1240K enriched libraries, which suggests maleness (24).

### **Population genetics**

Niederstotzingen genotype data were formatted with eigenstrat convert and merged using mergeit to modern West Eurasians and North Africans from the Human origins dataset (Fig. 2) (26, 56). The ancient individual's genotypes were called with pseudo-diploid method (11, 12, 24).

Population affinity was estimated with smartpca and admixture (56, 57). Ancient individuals were projected on modern West Eurasian data for PCA plotting. Prior to admixture analysis genotypes were pruned to reduce linkage disequilibrium (plink --indep-pairwise 200 25 0.5) (58). Each Niederstotzingen individual was separately analysed against West Eurasian and Middle Eastern/North African individuals in unsupervised admixture, this was to reduce artefacts of aDNA from potentially driving ancestral components. The K value of five was selected based on having the lowest CV error for each individual (table S12). In addition, to select K5; careful analysis of the ADMIXTURE results was required to avoid erroneous interpretation of the ancestral components or results (51). The PCA and admixture data were plotted with R package ggplot2 (59) and pophelper (60) respectively (Fig. 2 and fig. S5).

Outgroup F3-statistics for each population in the human origins dataset were used to formally estimate shared genetic drift among individuals compared to a common outgroup population (25, 26). The African Mbuti population was used as an outgroup to test against West Eurasian variety (table S5). F3-stats match the estimated ancestry for the theorised Northern/Eastern/Central European individuals mentioned above but show a cryptic genetic affinity for individuals 3B and 3C. These have the strongest relatedness to modern Northern Spanish, yet this affinity is relatively weak overall (fig. S8 and S9). This may be explained by recent admixture of 3B and 3C ancestors with south western European populations.

### **Kinship analysis based on genome wide analysis**

Often kinship studies require an array of diploid genotype SNP likelihoods for inheritance by state (IBS) estimates (15). Since the genotypes called in this analysis are low covered (1-2X covered) and are all pseudo-diploid, IBS needed to be estimated for the homozygosity of the genotypes. Pairwise estimates of kinship to 2<sup>nd</sup> degree were made with READ (relationship estimation from aDNA) (27). READ calculation was based on normalised proportion of non-matching alleles (P0) across the 1240K in non-overlapping 1Mbps blocks (table S15). READ is adapted for pseudo-diploid genotypes from GRAB software, which is a software applied to modern whole genome sequencing data and estimates relatedness to 5<sup>th</sup> degree. READ analyses data in TPED/TFAM format, which was converted using plink. P0 values are >0.9 for unrelated individuals, between 0.9 and 0.8 for second degree individuals, between 0.8 and 0.65 for first

degree individuals, and identical twins/identical are <0.65. READ accounts for population diversity and mitigates potential ascertainment bias in the dataset.

Pairwise non-normalised estimates of P0 were also made for all overlapping non-matching alleles. From this the coefficient of relatedness was estimated for each of the pairs using the following algorithm:

$$R = 1 - ((P0 - X) / X)$$

Where X is equal to the highest P0 divided by two in the cohort (table S16).



## Supplementary Figures

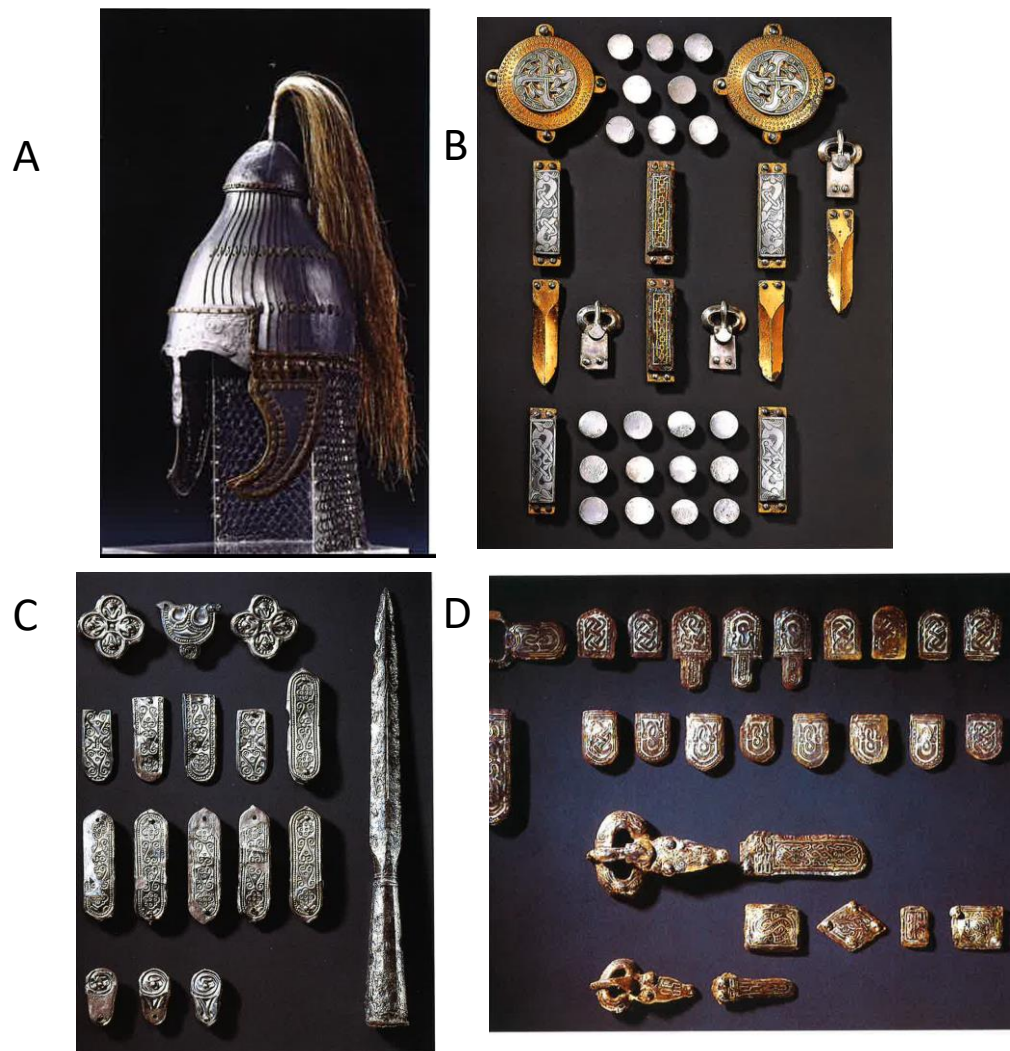

**Fig. S1. Photographs of burial goods with most specific cultural identifying markers. (A)** Grave 12 Byzantine lamella helmet and armour (reconstruction). **(B)** Grave 9: equestrian gear with Frankish ornamentation. **(C)** Grave 6: Longobard ornamented double-edged-sword and armour. **(D)** Grave 3A: Byzantine equestrian gear with silver ornamentation. Copyright: Landesmuseum Württemberg, P. Frankenstein/H. Zwietasch.

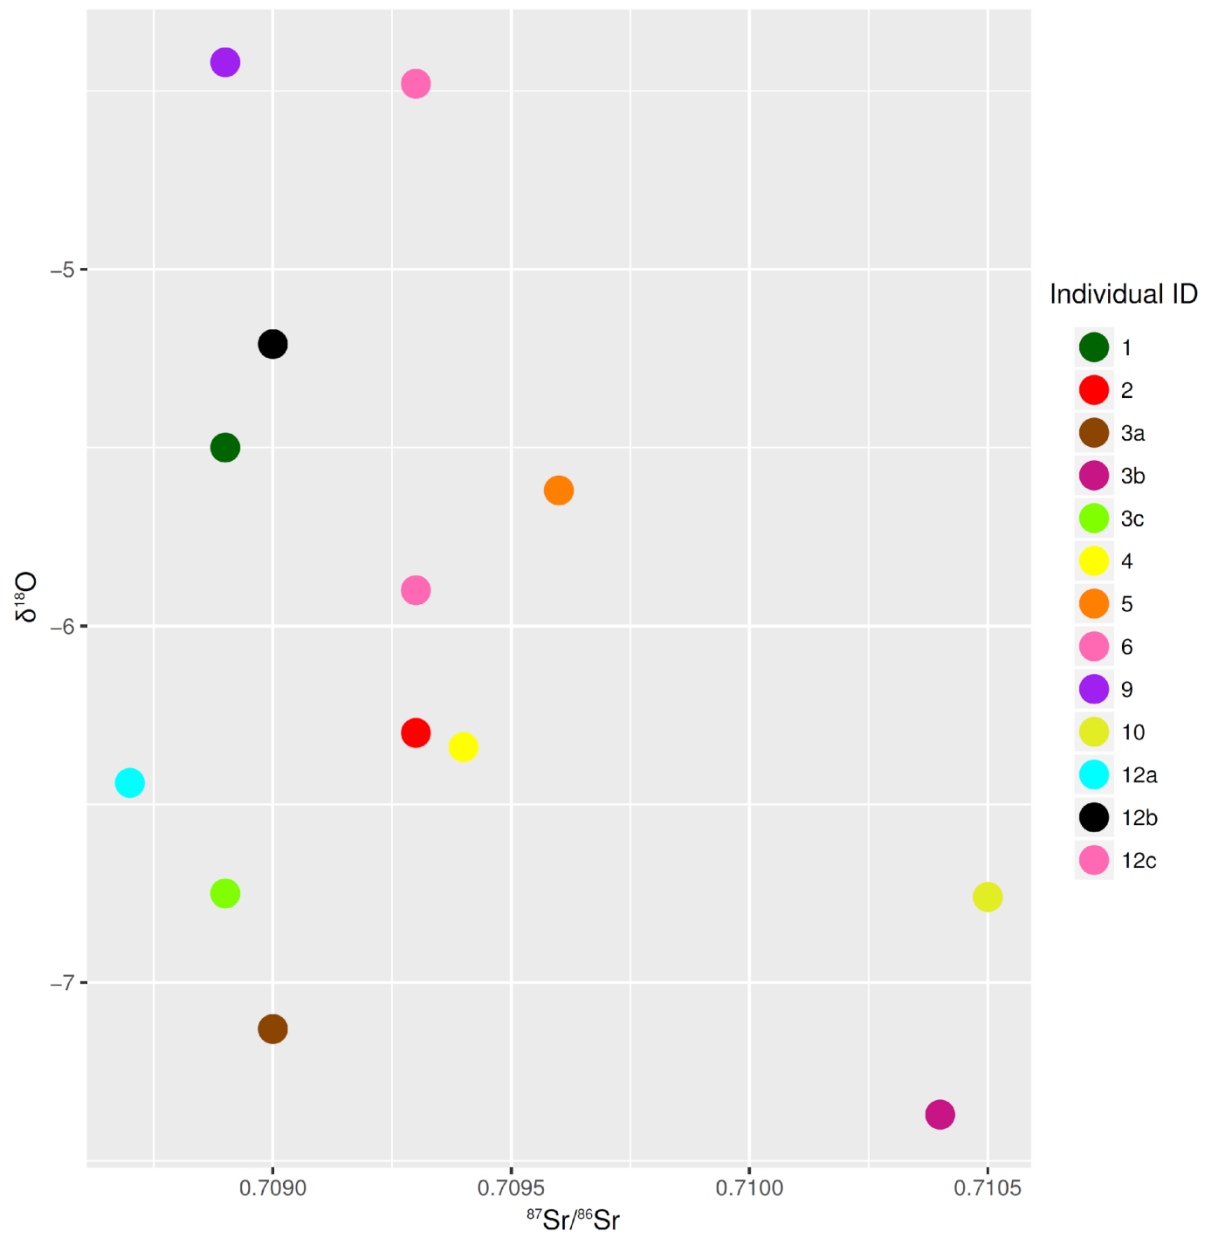

Fig. S2. Isotope  $^{86}\text{Sr}/^{87}\text{Sr}$  and  $\delta^{18}\text{O}$  values for enamel from teeth.

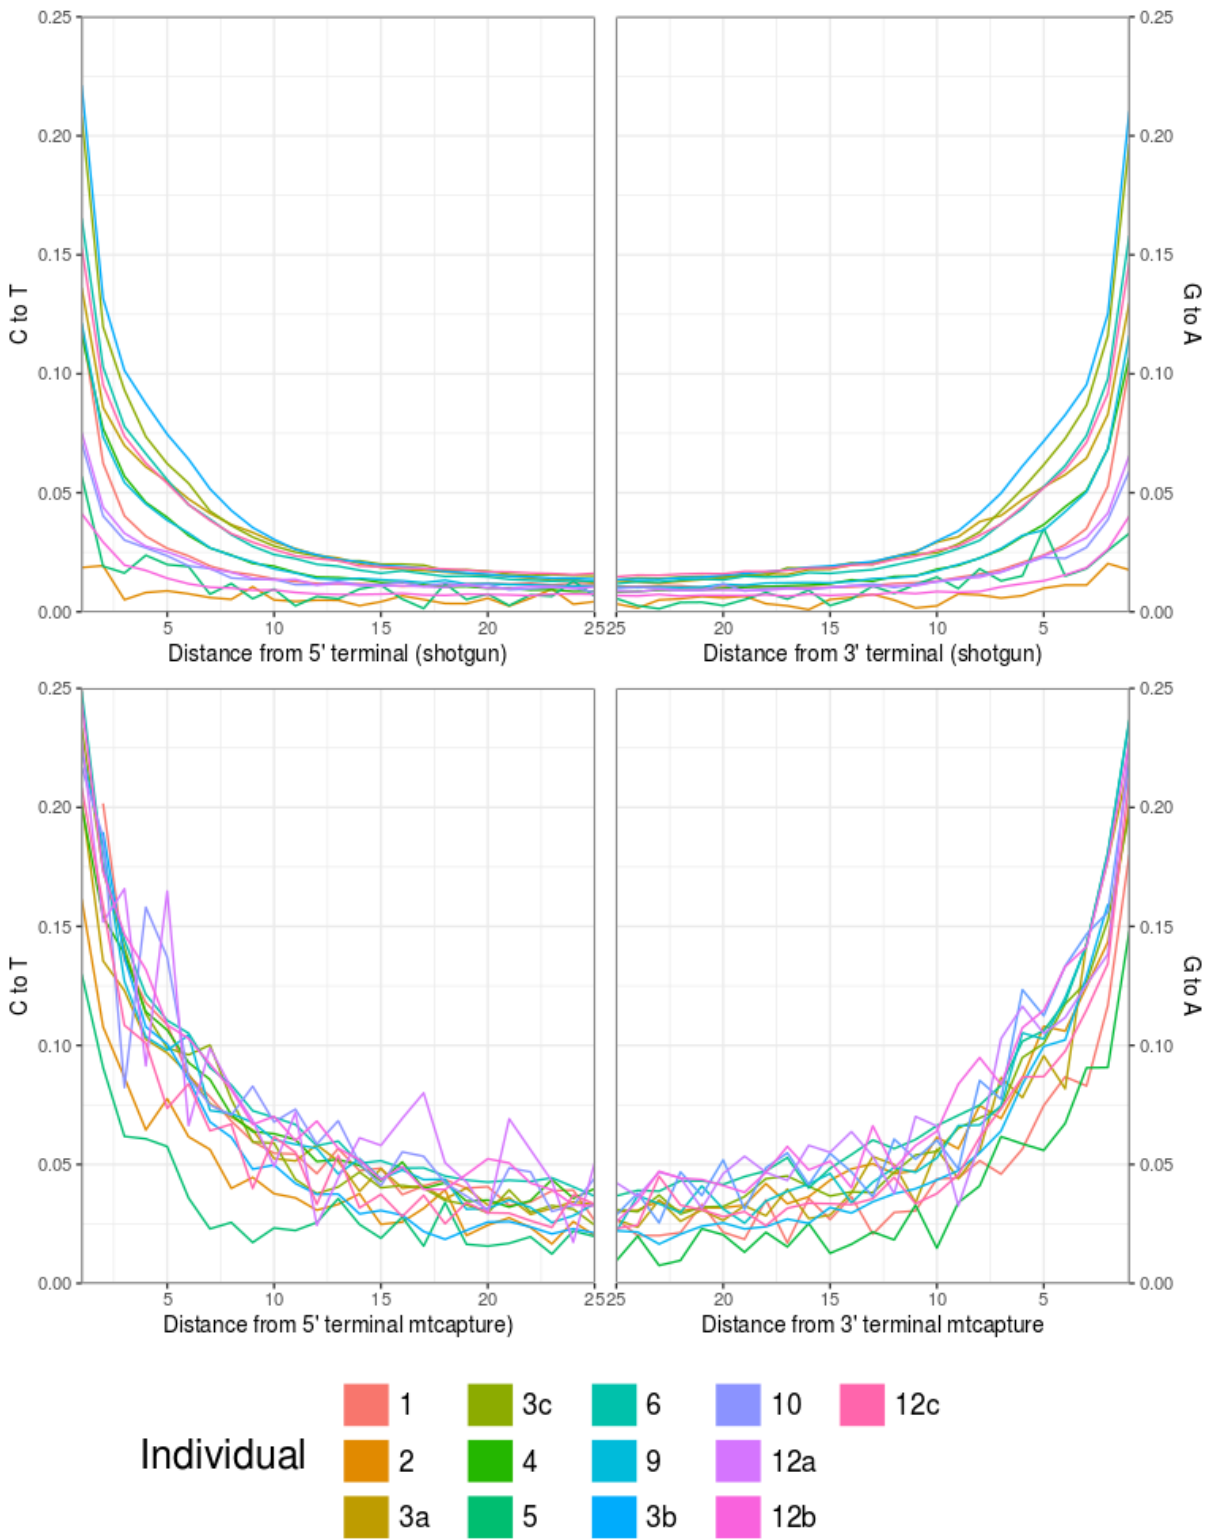

**Fig. S3. Overlaying shotgun and mtDNA deamination plots from mapDamage quantification against the reference genome.**

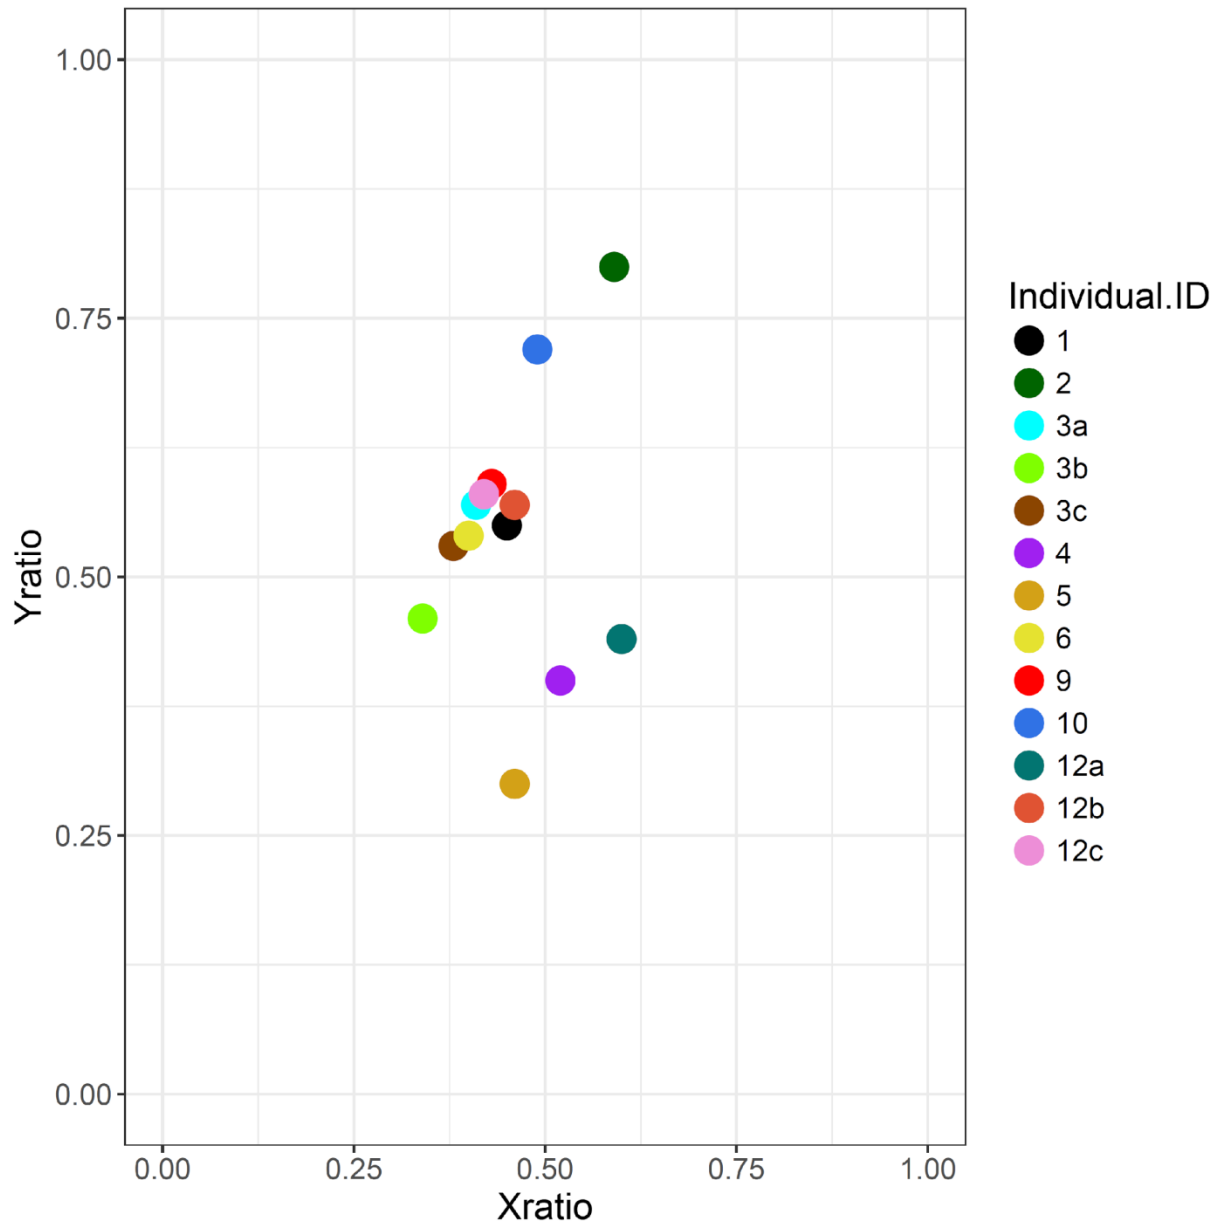

**Fig. S4. Genetic sex estimates from genome-wide capture.** Relative proportions of called X and Y genotypes against the autosomal genotypes. Ratio suggests that all individuals are male.

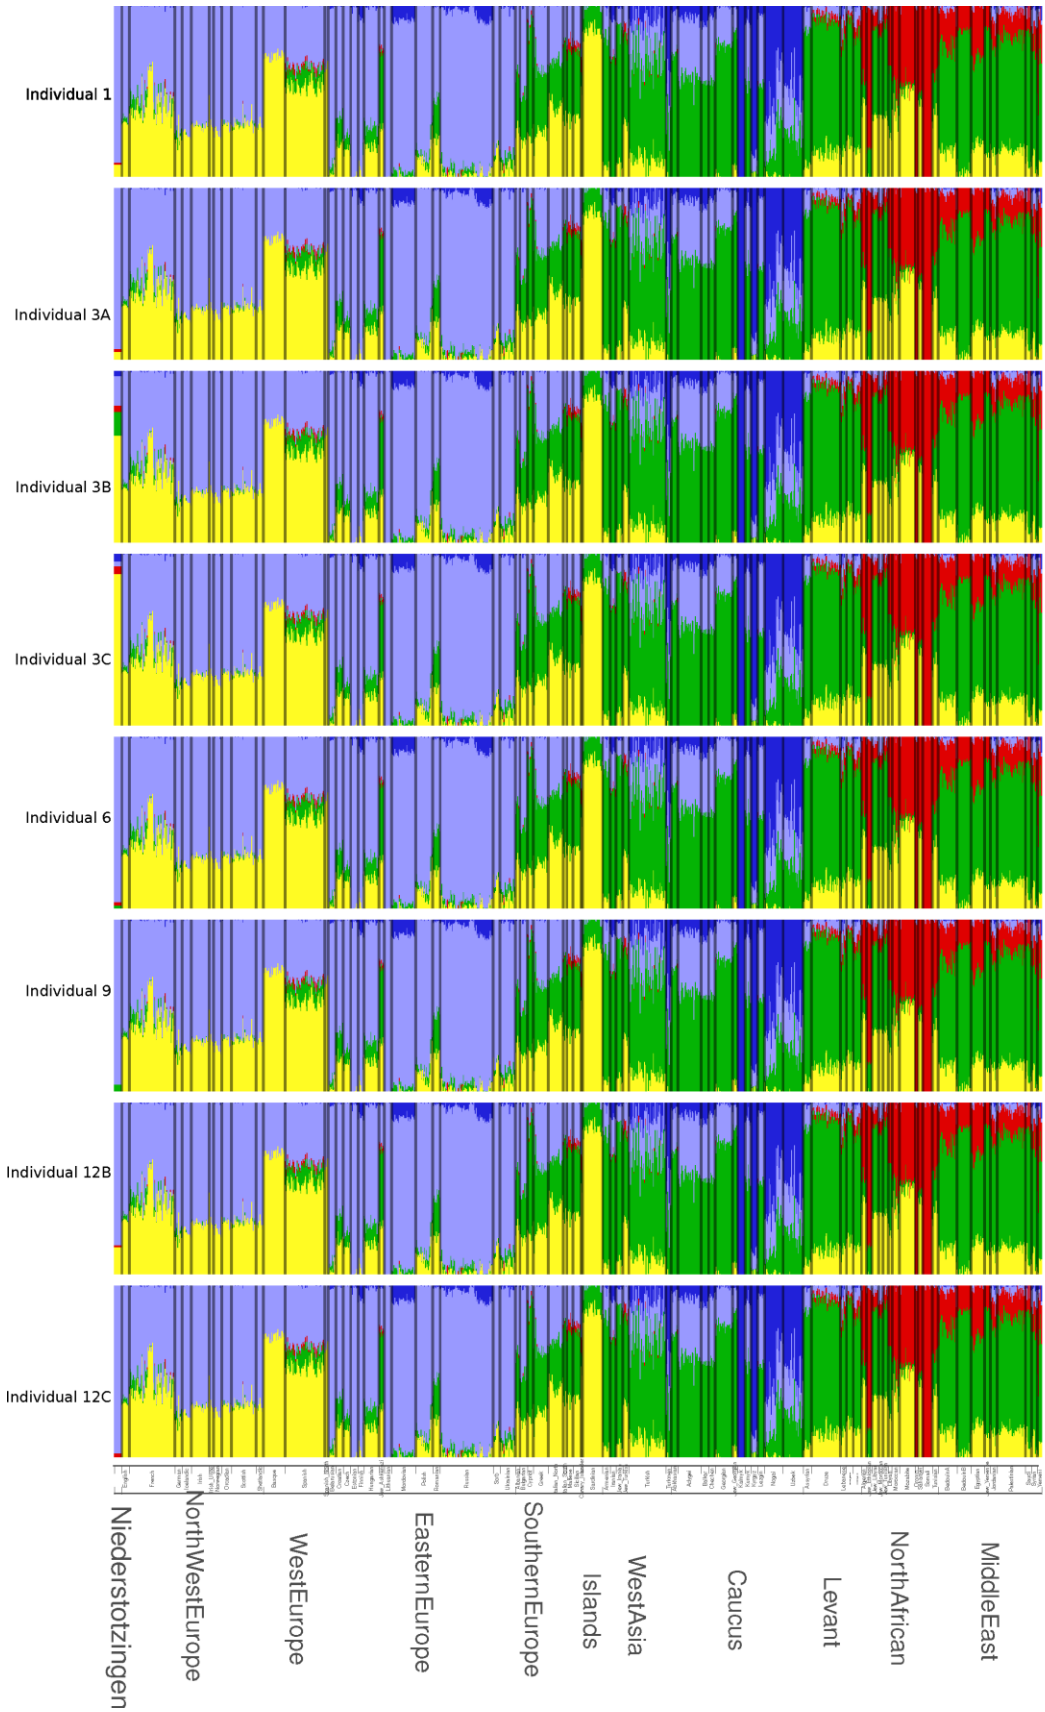

**Fig. S5. Admixture estimates for west Eurasians, Niederstotzingen, and selected ancient individuals.** Estimates based on five ancestral components. The ancestral components of each ancient individual are on the left hand side of the graph.

### F3 (Niederstotzingen 1;X;Mbuti)

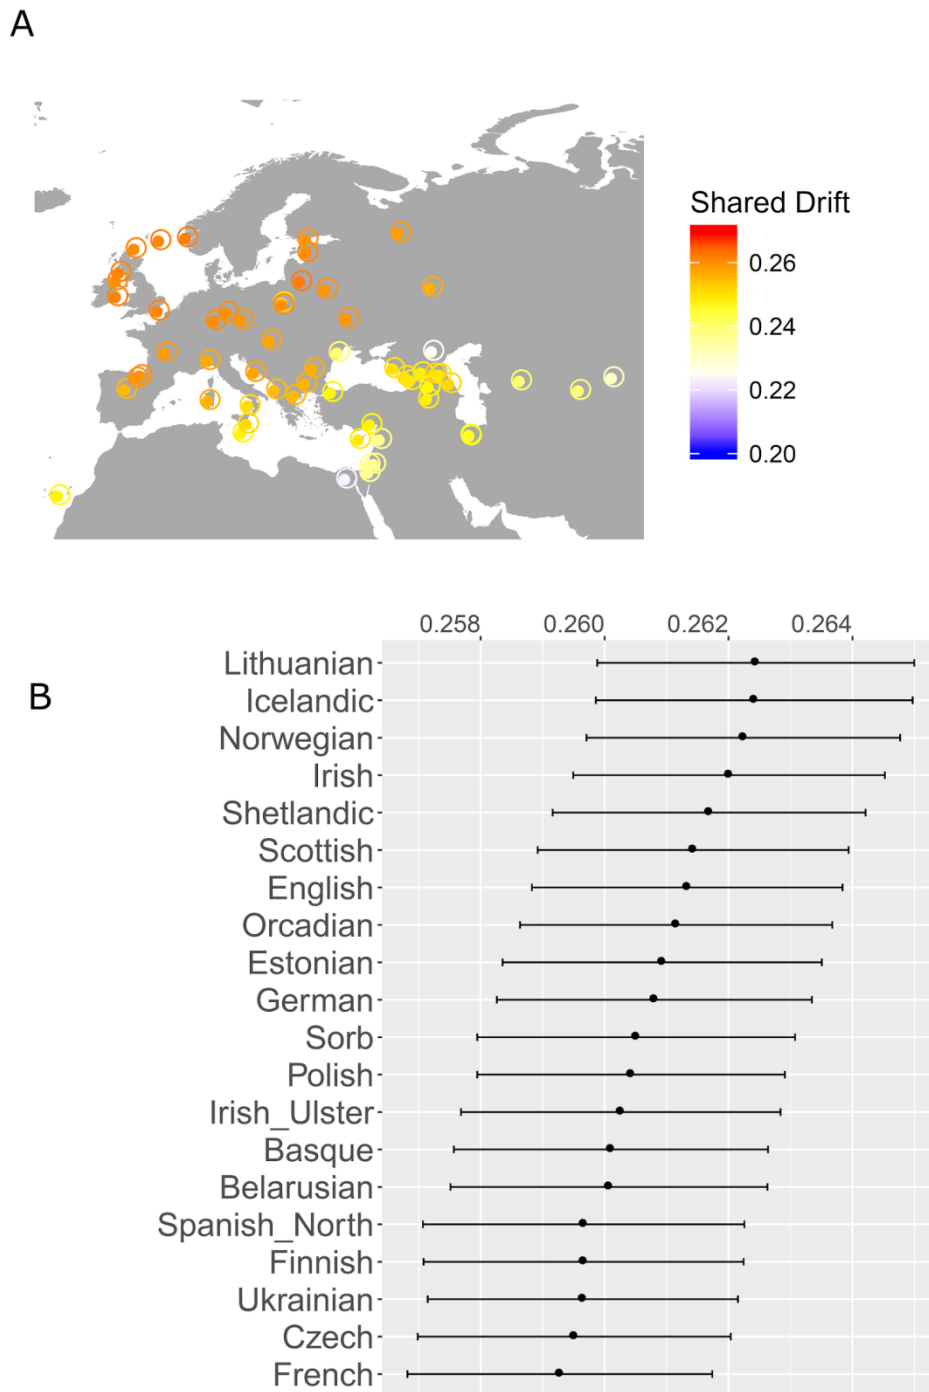

**Fig. S6. F3 outgroup statistics for Niederstotzingen 1 using Mbuti as an outgroup. (A)** f3 values plotted geographically across Western Eurasia. **(B)** 20 Eurasian populations with highest f3 values for each individual plotted on a line plot showing margins of error.

### F3 (Niederstotzingen 3A;X;Mbuti)

A

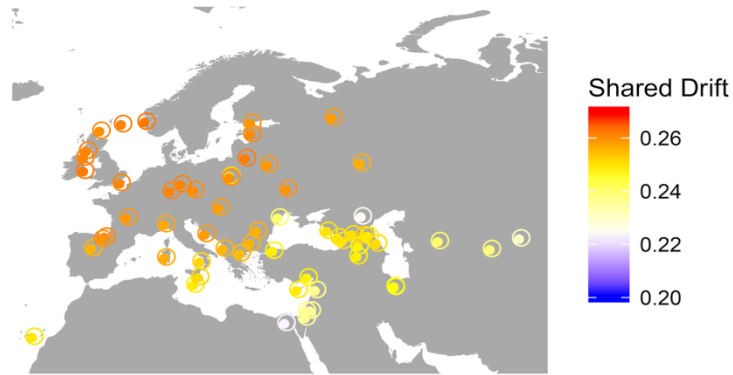

B

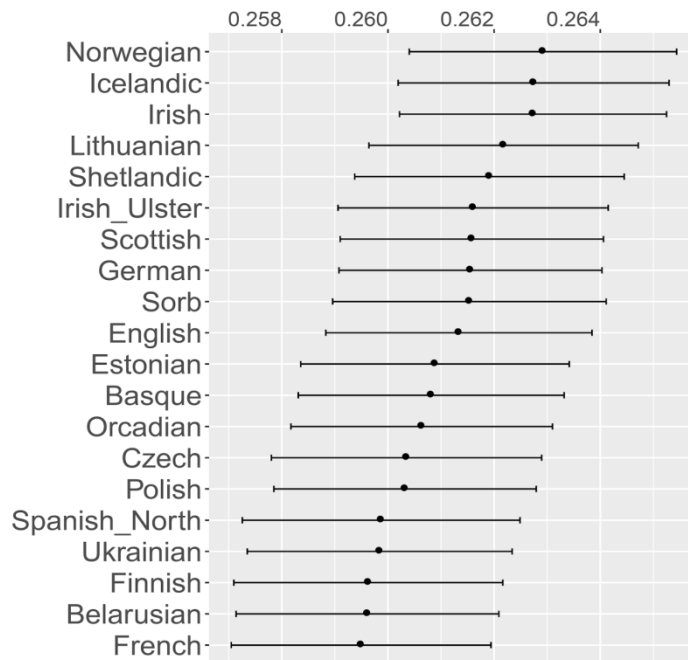

**Fig. S7. F3 outgroup statistics for Niederstotzingen 3A using Mbuti as an outgroup. (A)** f3 values plotted geographically across Western Eurasia. **(B)** 20 Eurasian populations with highest f3 values for each individual plotted on a line plot showing margins of error.

### F3 (Niederstotzingen 3B;X;Mbuti)

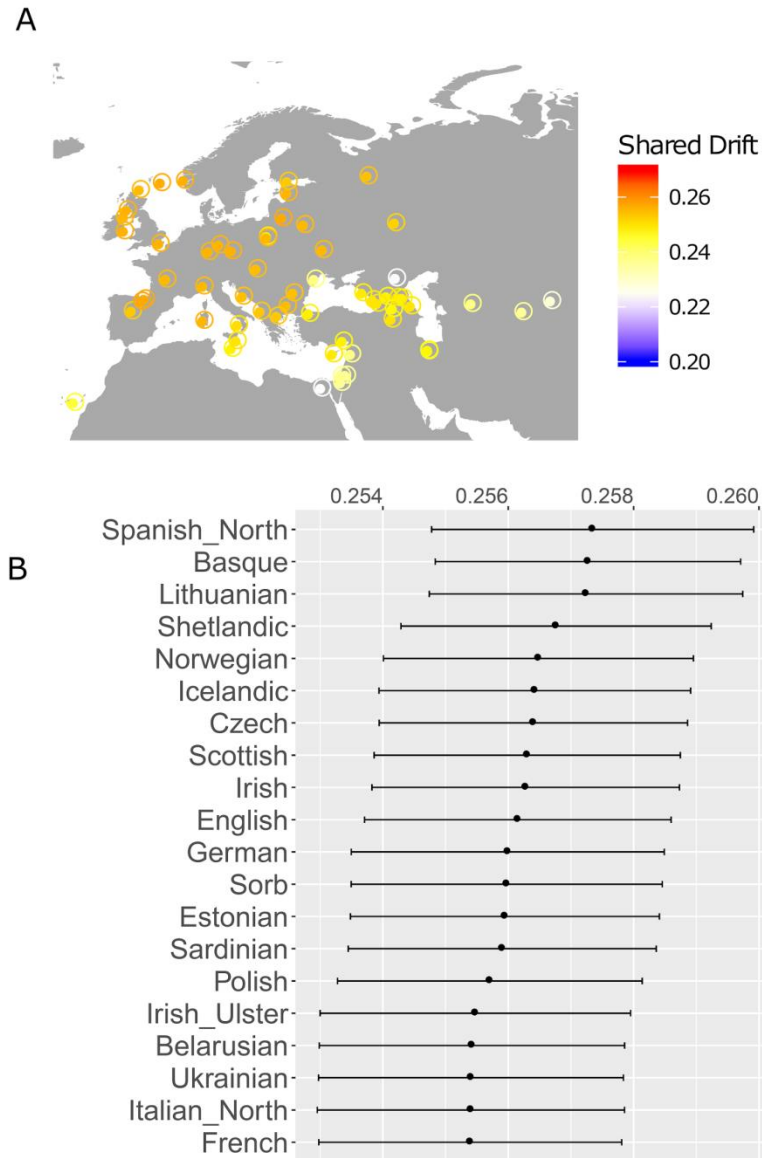

**Fig. S8. F3 outgroup statistics for Niederstotzingen 3B using Mbuti as an outgroup. (A)** f3 values plotted geographically across Western Eurasia. **(B)** 20 Eurasian populations with highest f3 values for each individual plotted on a line plot showing margins of error.



### F3 (Niederstotzingen 3C;X;Mbuti)

A

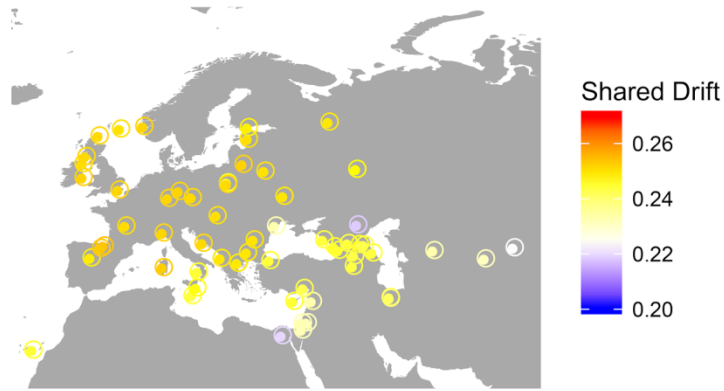

B

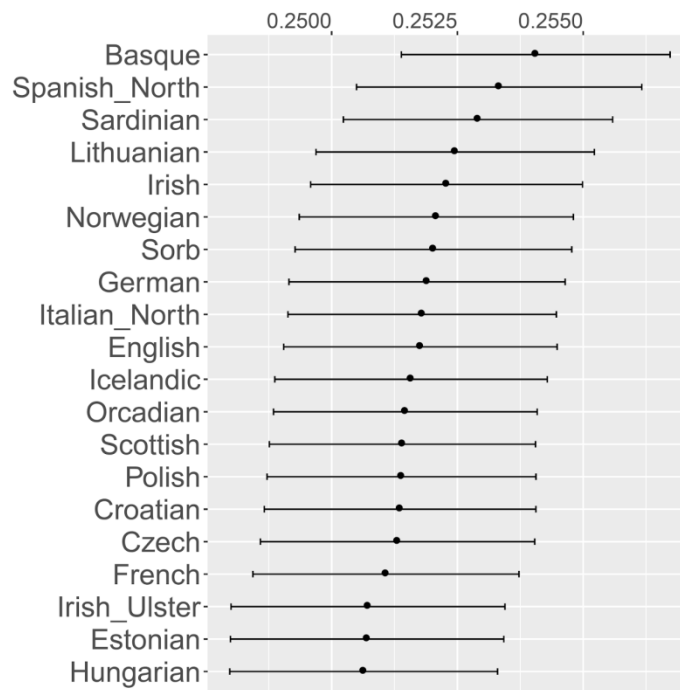

**Fig. S9. F3 outgroup statistics for Niederstotzingen 3C using Mbuti as an outgroup. (A)** f3 values plotted geographically across Western Eurasia. **(B)** 20 Eurasian populations with highest f3 values for each individual plotted on a line plot showing margins of error.

### F3 (Niederstotzingen 6;X;Mbuti)

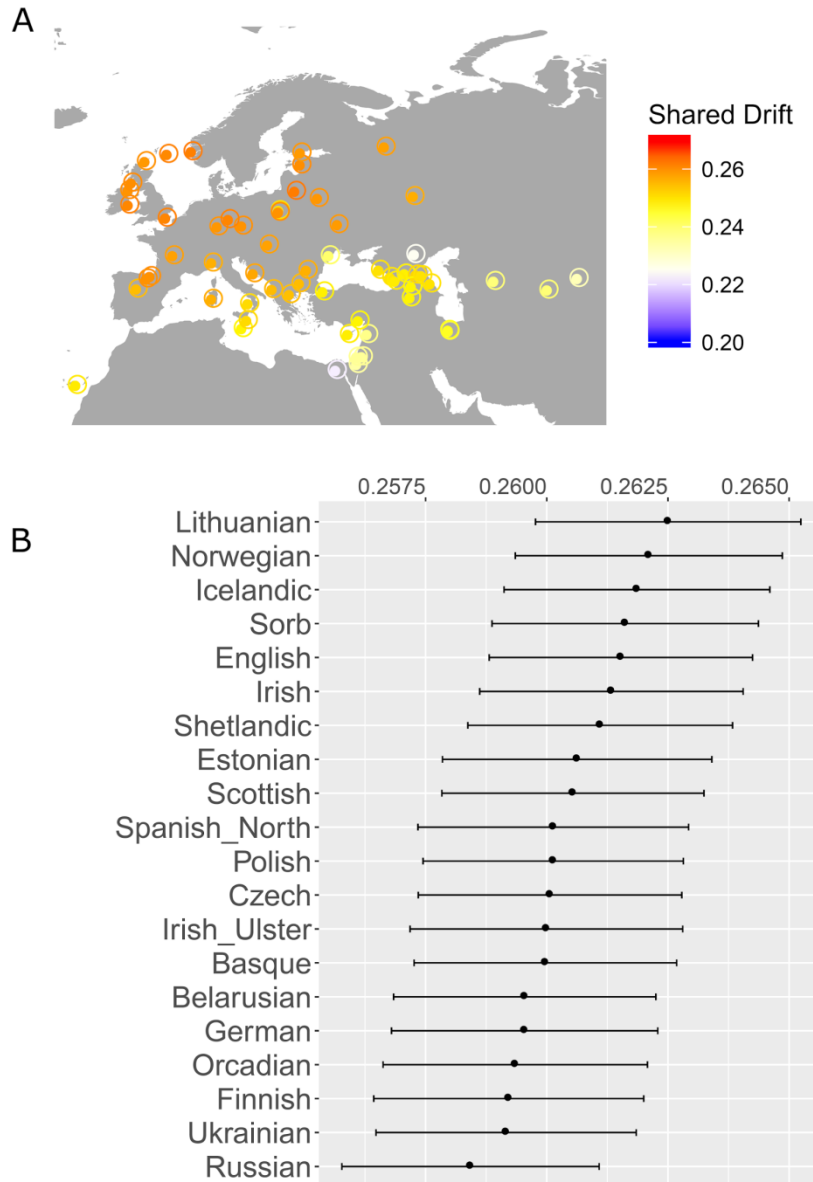

**Fig. S10. F3 outgroup statistics for Niederstotzingen 6 using Mbuti as an outgroup. (A)** f3 values plotted geographically across Western Eurasia. **(B)** 20 Eurasian populations with highest f3 values for each individual plotted on a line plot showing margins of error.

### F3 (Niederstotzingen 9;X;Mbuti)

A

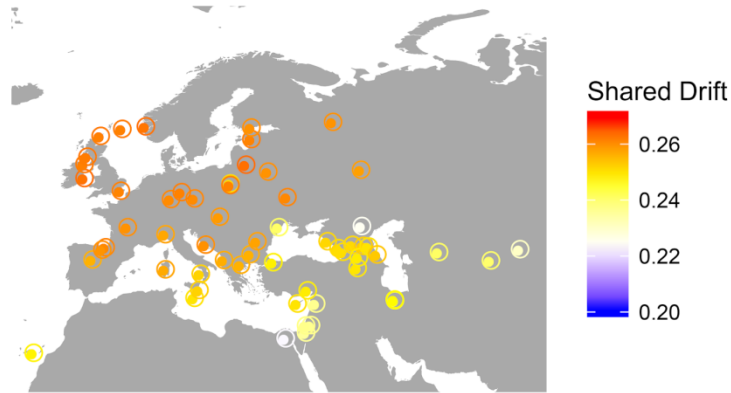

B

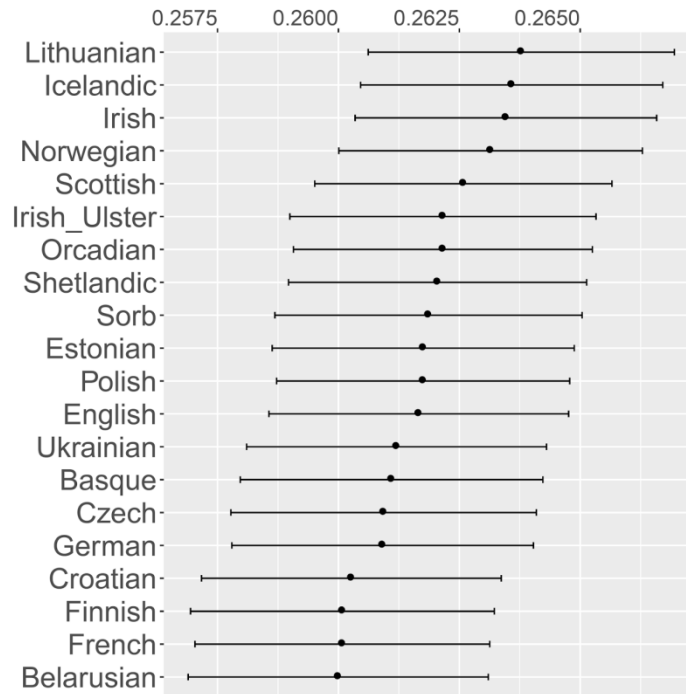

**Fig. S11. F3 outgroup statistics for Niederstotzingen 9 using Mbuti as an outgroup. (A)** f3 values plotted geographically across Western Eurasia. **(B)** 20 Eurasian populations with highest f3 values for each individual plotted on a line plot showing margins of error.

### F3 (Niederstotzingen 12B;X;Mbuti)

A

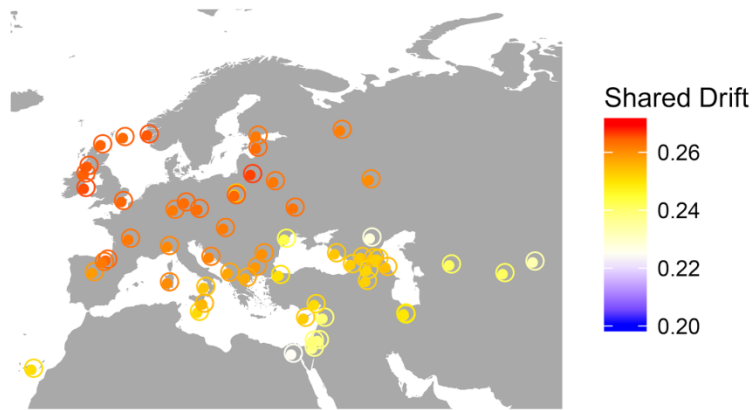

B

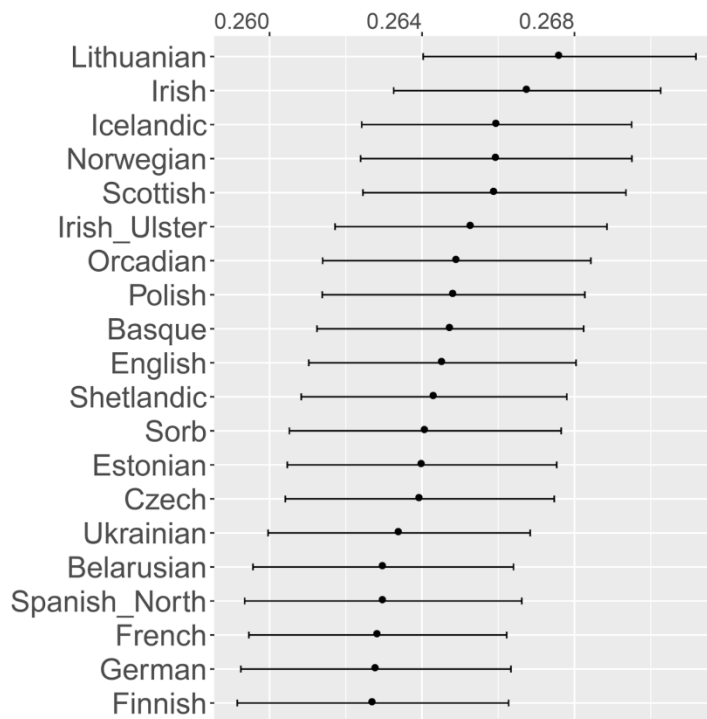

**Fig. S12. F3 outgroup statistics for Niederstotzingen 12B using Mbuti as an outgroup. (A)** f3 values plotted geographically across Western Eurasia. **(B)** 20 Eurasian populations with highest f3 values for each individual plotted on a line plot showing margins of error.

### F3 (Niederstotzingen 12C;X;Mbuti)

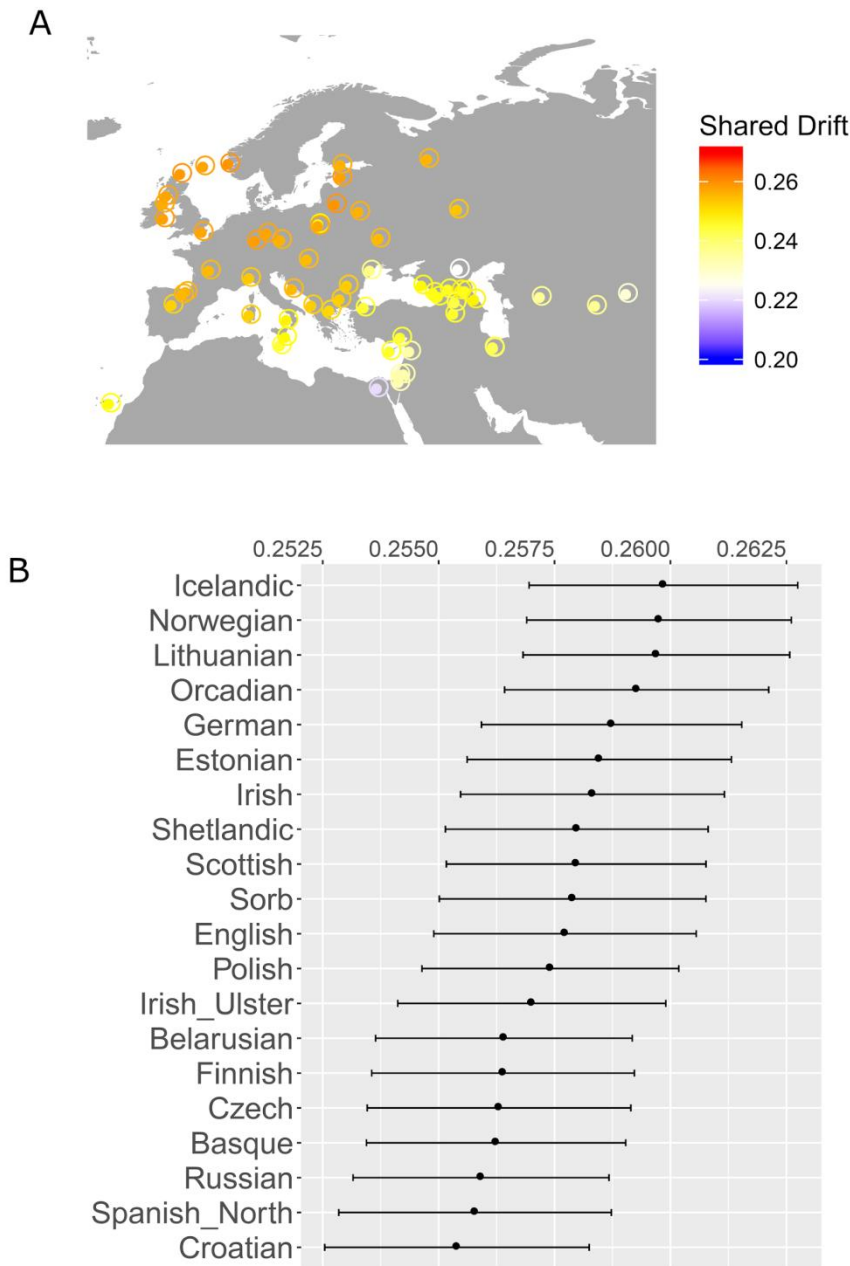

**Fig. S13. F3 outgroup statistics for Niederstotzingen 12C using Mbuti as an outgroup. (A)** f3 values plotted geographically across Western Eurasia. **(B)** 20 Eurasian populations with highest f3 values for each individual plotted on a line plot showing margins of error.

## Supplementary Tables

**Table S1. PCR-based haplotyping of DNA extracts from previous study.** Coloured rows indicate multiple burials. \*Anthropological Sex estimates from Creel 1967/Wahl 2011.

| Individual ID | Extraction ID | Sample   | Sex estimate* | mtDNA haplogroup | Single Nucleotide Polymorphisms (SNPs) |
|---------------|---------------|----------|---------------|------------------|----------------------------------------|
| <b>1</b>      | 1326          | Tooth 44 | m/m           | K                | T16093C, T16224C, T16311C              |
| <b>2</b>      | 1327          | Tooth 42 | -/-           | H                | G16129A, A16316G                       |
| <b>3a</b>     | 1328          | Tooth 44 | m/m           | K                | T16093C?, T16224C, T16311C             |
| <b>3a</b>     | 1572          | Tooth 42 |               | K                | T16093C, T16224C, T16311C              |
| <b>3b</b>     | 1329          | Tooth 44 | m/m           | I5a              | G16129A, C16148T, C16223T, G16391A     |
| <b>3b</b>     | 1573          | Tooth 12 |               | I5a              | G16129A, C16148T, C16223T, G16391A     |
| <b>3c</b>     | 1330          | Tooth 15 | m/m           | T                | T16126C, C16294T                       |
| <b>3c</b>     | 1574          | Tooth 44 |               | T                | T16126C, C16294T                       |
| <b>4</b>      | 1331          | Tooth 33 | -/-           | K                | T16093C, T16224C, T16311C              |
| <b>5</b>      | 1332          | Tooth 61 | -/-           | K                | T16093C, T16224C, T16311C              |
| <b>6</b>      | 1333          | Tooth 36 | ?/m           | -                | CRS                                    |
| <b>9</b>      | 1334          | Tooth 23 | m/m           | X                | T16189C, C16223T, C16278T              |
| <b>10</b>     | 1335          | Tooth 45 | m/-           | -                | T16189Y, T16224C, T16356Y              |
| <b>10</b>     | 1575          | Tooth 34 |               | -                | T16189Y, T16224C, T16356Y              |
| <b>12a</b>    | 1336          | Tooth 34 | m/m           | R                | T16093C?, C16221T                      |
| <b>12a</b>    | 1576          | Tooth 35 |               | R                | T16093C, C16221T                       |
| <b>12b</b>    | 1337          | Tooth 44 | m/m           | X                | T16189C, C16223T, C16278T              |
| <b>12b</b>    | 1577          | Tooth 32 |               | X                | T16189C, C16223T?, C16278T             |
| <b>12c</b>    | 1338          | Tooth 34 | m+w/m         | U5a              | C16256T, C16270T, A16399G              |
| <b>12c</b>    | 1578          | Tooth 45 |               | U5a              | C16256T, C16270T, A16399G?             |

**Table S2. Archeological context and isotopes.** \*Strontium values support non-local provenance (data from previous study). Coloured rows indicate multiple burials. §Wahl 2011.

| Individual ID | Age estimate (years)§ | Sex estimate (osteological) | $^{87}\text{Sr}/^{86}\text{Sr}$ | $\delta^{13}\text{C}$ | $\delta^{18}\text{O}$ | Archeological context |
|---------------|-----------------------|-----------------------------|---------------------------------|-----------------------|-----------------------|-----------------------|
| 1             | 40-50                 | male                        | 0.7089                          | -12.88                | -5.5                  |                       |
| 2             | 9-11                  | Uncertain                   | 0.7093                          | -12.85                | -6.3                  |                       |
| 3a            | 20-30                 | male                        | 0.709                           | -13.43                | -7.13                 | Byzantine             |
| 3b            | 50-60                 | male                        | 0.7104*                         | -13.16                | -7.37                 |                       |
| 3c            | 20-30                 | male                        | 0.7089                          | -13.45                | -6.75                 |                       |
| 4             | 2                     | Uncertain                   | 0.7094                          | -12.64                | -6.34                 |                       |
| 5             | 0.5-2                 | Uncertain                   | 0.7096                          | -12.78                | -5.62                 |                       |
| 6             | 14-17                 | Uncertain                   | 0.7093                          | -14.01                | -4.48                 | Lombard               |
| 7             | NA                    | NA                          | NA                              | NA                    | NA                    |                       |
| 8             | NA                    | NA                          | NA                              | NA                    | NA                    |                       |
| 9             | 40-50                 | male                        | 0.7089                          | -13.63                | -4.42                 | Franconian            |
| 10            | 20-25                 | male                        | 0.7105*                         | -11.21                | -6.76                 |                       |
| 11            | NA                    | NA                          | NA                              | NA                    | NA                    |                       |
| 12a           | 25-35                 | male                        | 0.7087                          | -13.33                | -6.44                 |                       |
| 12b           | 30-40                 | male                        | 0.709                           | -13.92                | -5.21                 | Byzantine             |
| 12c           | 20-30                 | Uncertain                   | 0.7093                          | -13.43                | -5.9                  |                       |

**Table S3. Shotgun sequencing output and mapping data.** \*endogenous percentage represents all reads that map to human genome (hg19) that have mapping quality above 30 and duplicates retained. §Libraries selected for genome wide capture due to higher coverage than other subsample from the same individual. **Green** and **red** colouration represents individuals buried in multiple burials 12 and 3, respectively.

| Individual ID | Library ID | # of Merge d Reads > length 30 | # mapped reads prior RMDup and quality > 30 | % Total Endogenous DNA* | #reads after deduplicated and mapping quality > 30 | % mtDNA reads quality > 30 | % reads overlap with 1240K quality > 30 |
|---------------|------------|--------------------------------|---------------------------------------------|-------------------------|----------------------------------------------------|----------------------------|-----------------------------------------|
| 1             | 1326 §     | 2601278                        | 883832                                      | 33.98                   | 732607                                             | 0.020                      | 1.06                                    |
| 2             | 1327 §     | 2629465                        | 5859                                        | 0.22                    | 4740                                               | 0.004                      | 0.01                                    |
| 3a            | 1328 §     | 2274652                        | 217938                                      | 9.58                    | 160264                                             | 0.020                      | 0.23                                    |
| 3a            | 1572       | 189346                         | 24345                                       | 12.86                   | 9577                                               | 0.001                      | 0.29                                    |
| 3b            | 1329       | 1465161                        | 24711                                       | 1.69                    | 19281                                              | 0.010                      | 0.05                                    |
| 3b            | 1573 §     | 4325231                        | 3350473                                     | 77.46                   | 2321267                                            | 0.005                      | 1.51                                    |
| 3c            | 1330 §     | 3146945                        | 186096                                      | 5.91                    | 129531                                             | 0.003                      | 0.12                                    |
| 3c            | 1574       | 3932684                        | 671661                                      | 17.08                   | 408134                                             | 0.007                      | 0.27                                    |
| 4             | 1331 §     | 3132678                        | 313851                                      | 10.02                   | 223767                                             | 0.012                      | 0.24                                    |
| 5             | 1332 §     | 2731735                        | 4145                                        | 0.15                    | 2668                                               | 0.007                      | 0.00                                    |
| 6             | 1333 §     | 2750558                        | 251673                                      | 9.15                    | 180766                                             | 0.021                      | 0.20                                    |
| 9             | 1334 §     | 4385230                        | 332779                                      | 7.59                    | 227654                                             | 0.011                      | 0.18                                    |
| 10            | 1335       | 5153487                        | 6651                                        | 0.13                    | 4860                                               | 0.001                      | 0.00                                    |
| 10            | 1575 §     | 4274087                        | 74763                                       | 1.75                    | 54762                                              | 0.006                      | 0.05                                    |
| 12a           | 1336 B     | 3411461                        | 454974                                      | 13.34                   | 367974                                             | 0.014                      | 0.40                                    |
| 12a           | 1576 §     | 3251558                        | 327741                                      | 10.08                   | 166446                                             | 0.019                      | 0.28                                    |
| 12b           | 1337       | 3681461                        | 4849                                        | 0.13                    | 2537                                               | 0.007                      | 0.00                                    |



|            |           |             |        |       |        |       |      |
|------------|-----------|-------------|--------|-------|--------|-------|------|
| <b>12b</b> | 1577<br>§ | 34458<br>07 | 320079 | 9.29  | 244114 | 0.021 | 0.29 |
| <b>12c</b> | 1338      | 49197<br>57 | 378718 | 7.70  | 282123 | 0.015 | 0.22 |
| <b>12c</b> | 1578<br>§ | 42490<br>45 | 891545 | 20.98 | 605680 | 0.005 | 0.39 |

---

**Table S4. mtDNA capture sequencing output data and mapping.** \*% of mapped reads to rCRS reads that have map quality above 30 and prior to deduplication. §Efficiency capture measure is based on division of the percentage of reads in shotgun and mtDNA capture (% mtDNA reads in table S3). **Green** and **red** colouration represents individuals buried in multiple burials 12 and 3, respectively.

| Individual ID | Library ID  | # reads after C&M length > 30 | # mapped reads prior RMDup > quality 30 | %Endogenous DNA* | #Mapped Reads deduplicated and quality > 30 | Mean Coverage unique reads | std. dev. Coverage | Capture enrichment efficiency§ |
|---------------|-------------|-------------------------------|-----------------------------------------|------------------|---------------------------------------------|----------------------------|--------------------|--------------------------------|
| 1             | 1326        | 1268373                       | 252928                                  | 19.94            | 16823                                       | 79.92                      | 37.1               | 978.7                          |
| 2             | 1327        | 3596840                       | 53136                                   | 1.48             | 4766                                        | 25.09                      | 12.44              | 346.8                          |
| <b>3a</b>     | <b>1328</b> | <b>2950924</b>                | <b>277524</b>                           | <b>9.40</b>      | <b>19436</b>                                | <b>103.72</b>              | <b>42.47</b>       | <b>462.0</b>                   |
| <b>3b</b>     | <b>1573</b> | <b>3384347</b>                | <b>120641</b>                           | <b>3.56</b>      | <b>11605</b>                                | <b>40.4</b>                | <b>25</b>          | <b>670.3</b>                   |
| <b>3c</b>     | <b>1330</b> | <b>1222172</b>                | <b>45825</b>                            | <b>3.75</b>      | <b>3529</b>                                 | <b>15.13</b>               | <b>6.15</b>        | <b>1388.2</b>                  |
| 4             | 1331        | 6775001                       | 214653                                  | 3.17             | 14747                                       | 76.62                      | 26.85              | 273.4                          |
| 5             | 1332        | 2649216                       | 122411                                  | 4.62             | 2633                                        | 12.97                      | 6.05               | 657.4                          |
| 6             | 1333        | 4689859                       | 390109                                  | 8.32             | 50098                                       | 278.7                      | 90.14              | 400.0                          |
| 9             | 1334        | 5323643                       | 315358                                  | 5.92             | 6511                                        | 28.48                      | 10.53              | 542.3                          |
| 10            | 1575        | 817315                        | 112591                                  | 13.78            | 1868                                        | 10.79                      | 6.76               | 2494.9                         |
| <b>12a</b>    | <b>1576</b> | <b>1338414</b>                | <b>313047</b>                           | <b>23.39</b>     | <b>1386</b>                                 | <b>8.01</b>                | <b>4.97</b>        | <b>1213.0</b>                  |
| <b>12b</b>    | <b>1577</b> | <b>1941732</b>                | <b>348687</b>                           | <b>17.96</b>     | <b>7965</b>                                 | <b>41.2</b>                | <b>18.52</b>       | <b>872.8</b>                   |
| <b>12c</b>    | <b>1578</b> | <b>2669480</b>                | <b>133618</b>                           | <b>5.01</b>      | <b>4795</b>                                 | <b>24.77</b>               | <b>14.46</b>       | <b>989.2</b>                   |

**Table S5. 1240K sequencing output data and mapping.** \*non-UDG treated libraries. §Percentage of mapped reads to that overlap with 1240K with mapping quality above 30 and before deduplication. ~Capture enrichment efficiency is estimated from the division of the percentage of reads overlapping with the 1240K array in the capture libraries over the shotgun libraries before deduplication, (table S3). †Libraries that had insufficient enrichment for population genetics. **Green** and **red** colouration represents individuals buried in multiple burials 12 and 3, respectively.

| Individual ID | Library ID | # reads after C&M prior mapping | # mapped reads prior RMDup that overlap with 1240K array | §Endogenous DNA (%) quality > 30 | #reads duplicates removed and q> 30 | Mean Coverage | std. dev. Coverage | genotype Overlap with 1240K | genotype Overlap with HO | Capture Enrichment efficiency~ |
|---------------|------------|---------------------------------|----------------------------------------------------------|----------------------------------|-------------------------------------|---------------|--------------------|-----------------------------|--------------------------|--------------------------------|
| 1             | 1326       | 11019504                        | 3782425                                                  | 34.32                            | 984227                              | 0.85          | 1.14               | 583209                      | 306662                   | 32.7                           |
| 2             | 1327*†     | 4231587                         | 793951                                                   | 18.76                            | 18628                               | 0.02          | 0.23               | 10031                       | 5150                     | 2790.2                         |
| 3a            | 1328       | 17063625                        | 4763700                                                  | 27.92                            | 793078                              | 0.68          | 1.04               | 490654                      | 260257                   | 123.3                          |
| 3b            | 1573       | 18357358                        | 6141901                                                  | 33.46                            | 2121562                             | 1.79          | 2.56               | 672872                      | 374347                   | 22.3                           |
| 3c            | 1330       | 22522015                        | 6121123                                                  | 27.18                            | 352083                              | 0.29          | 0.69               | 254250                      | 136862                   | 232.5                          |
| 4             | 1331†      | 3691000                         | 121598                                                   | 3.29                             | 1948                                | 0.00          | 0.06               | 1293                        | 697                      | 13.6                           |
| 5             | 1332†      | 7055785                         | 645416                                                   | 9.15                             | 5193                                | 0.00          | 0.12               | 2798                        | 1475                     | 2191.0                         |
| 6             | 1333       | 13671307                        | 3485683                                                  | 25.50                            | 480461                              | 0.41          | 0.78               | 341584                      | 180449                   | 129.2                          |
| 9             | 1334       | 11904124                        | 3356524                                                  | 28.20                            | 284475                              | 0.24          | 0.63               | 208884                      | 109961                   | 154.6                          |
| 10            | 1575*†     | 5292788                         | 1136390                                                  | 21.47                            | 21057                               | 0.02          | 0.21               | 13340                       | 6922                     | 441.2                          |
| 12a           | 1576*†     | 5356151                         | 1603754                                                  | 29.94                            | 78845                               | 0.07          | 0.35               | 57517                       | 29673                    | 110.5                          |
| 12b           | 1577       | 10415425                        | 2805511                                                  | 26.94                            | 195274                              | 0.17          | 0.56               | 138500                      | 72868                    | 92.9                           |
| 12c           | 1578       | 9479208                         | 2735735                                                  | 28.86                            | 433220                              | 0.37          | 0.75               | 308135                      | 162405                   | 75.0                           |

**Table S6. Schmutzi estimation of mtDNA contamination.** Green and red coloration represents individuals buried in multiple burials 12 and 3, respectively.

| Individual | Library ID | Median | Lower | Upper |
|------------|------------|--------|-------|-------|
| 1          | 1326       | 0.03   | 0.02  | 0.04  |
| 2          | 1327       | 0.15   | 0.14  | 0.16  |
| 3a         | 1328       | 0.02   | 0.01  | 0.03  |
| 3b         | 1573       | 0.03   | 0.02  | 0.04  |
| 3c         | 1330       | 0.03   | 0.02  | 0.04  |
| 4          | 1331       | 0.03   | 0.02  | 0.04  |
| 5          | 1332       | 0.04   | 0.03  | 0.05  |
| 6          | 1333       | 0.02   | 0.02  | 0.02  |
| 9          | 1334       | 0.04   | 0.03  | 0.05  |
| 10         | 1575       | 0.06   | 0.04  | 0.08  |
| 12a        | 1576       | 0.09   | 0.07  | 0.11  |
| 12b        | 1577       | 0.03   | 0.02  | 0.04  |
| 12c        | 1578       | 0.03   | 0.02  | 0.04  |

**Table S7. ANGSD X chromosome contamination estimate on 1240K libraries.** Contamination estimate chosen from Method2: new llh with standard error (SE). **Green** and **red** colouration represents individuals buried in multiple burials 12 and 3, respectively.

| Individual ID | Library ID | Contamination | SE       |
|---------------|------------|---------------|----------|
| 1             | 1326       | 0.001923      | 2.87E-03 |
| 3a            | 1328       | 0.014507      | 7.12E-03 |
| 3b            | 1573       | 0.000928      | 2.41E-03 |
| 3c            | 1330       | 0.040375      | 2.03E-02 |
| 6             | 1333       | -0.00068      | 1.17E-03 |
| 9             | 1334       | -0.00473      | 4.66E-03 |
| 12b           | 1577       | 0.012842      | 1.36E-02 |
| 12c           | 1578       | 0.000982      | 7.78E-03 |

**Table S8. Haplogroups and private mutations for each mtDNA capture (phylotree 17).** \*missing because loci were quality filtered by log2fasta (quality > 20). **Green** and **red** colouration represents individuals buried in multiple burials 12 and 3, respectively.

| Individual | Library ID  | Haplogroup    | Non haplogroup defining mutations | Missing mutations                                  |
|------------|-------------|---------------|-----------------------------------|----------------------------------------------------|
| <b>1</b>   | 1326        | K1a           | 8955C,12063T,14602G               | 195T                                               |
| <b>2</b>   | 1327        | K1a1b2a1a     | 770T,11053G                       | 114T,16093C*                                       |
| <b>3a</b>  | <b>1328</b> | <b>K1a</b>    | <b>8955C,12063T,14602G</b>        | <b>195T</b>                                        |
| <b>3b</b>  | <b>1573</b> | <b>I5a1b</b>  |                                   |                                                    |
| <b>3c</b>  | <b>1330</b> | <b>T2</b>     | <b>248G,515G</b>                  | <b>16296T</b>                                      |
| <b>4</b>   | 1331        | X2b4          | 310C,3106A,13676G,16183C          |                                                    |
| <b>5</b>   | 1332        | K1a1b2a1a     | 770T,11053G                       | 114T                                               |
| <b>6</b>   | 1333        | H65a          |                                   |                                                    |
| <b>9</b>   | 1334        | X2b4          | 310C,13676G,16183C                |                                                    |
| <b>10</b>  | 1575        | H1b           | 15955G,16183C                     | 7028C                                              |
| <b>12a</b> | <b>1576</b> | <b>H10e1</b>  | <b>5104T,7598A,14016A,14281T</b>  | <b>2758G*,4104A*,4312C*,10398A,16230A*,16311T*</b> |
| <b>12b</b> | <b>1577</b> | <b>X2b4</b>   | <b>310C,13676G,16183C</b>         |                                                    |
| <b>12c</b> | <b>1578</b> | <b>U5a1a1</b> |                                   |                                                    |

**Table S9. Complete list of NRY haplogroups with identifying ISOGG markers for 1240K capture sequences.** Positions with multiple marker names indicate current overlapping nomenclature of ISOGG database (11.01).

| Individual | position | haplogroup         | Ancestral | Derived | Depth | Markers                  |
|------------|----------|--------------------|-----------|---------|-------|--------------------------|
| 1          | 19267344 | R                  | C         | A       | 2     | P285                     |
| 1          | 22750583 | R1                 | C         | A       | 1     | M306,PF6147,S1           |
| 1          | 9989615  | R1                 | A         | G       | 1     | P231                     |
| 1          | 17782178 | R1                 | C         | G       | 1     | P236                     |
| 1          | 18914441 | R1b1               | C         | T       | 2     | L278                     |
| 1          | 18656508 | R1b1a              | G         | C       | 1     | P297,PF6398              |
| 1          | 8070532  | R1b1a2             | T         | A       | 1     | PF6430                   |
| 1          | 22739367 | R1b1a2             | T         | C       | 1     | M269                     |
| 1          | 22796697 | R1b1a2             | T         | C       | 1     | CTS10834                 |
| 1          | 8149348  | R1b1a2             | A         | G       | 1     | L265,PF6431              |
| 1          | 8411202  | R1b1a2             | A         | G       | 2     | PF6434                   |
| 1          | 18381735 | R1b1a2             | A         | G       | 2     | PF6482,YSC0000203        |
| 1          | 21222868 | R1b1a2             | C         | G       | 2     | PF6497,YSC0000219        |
| 1          | 6912992  | R1b1a2             | T         | G       | 2     | CTS623                   |
| 1          | 18167403 | R1b1a2             | C         | T       | 2     | CTS8728,L1063,PF6480,S13 |
| 1          | 17844018 | R1b1a2a1a          | T         | C       | 1     | L11,PF6539,S127          |
| 1          | 18248698 | R1b1a2a1a          | A         | G       | 1     | P311,PF6545,S128         |
| 1          | 17663668 | R1b1a2a1a1c2b2b    | T         | A       | 1     | Z347                     |
| 1          | 7792995  | R1b1a2a1a1c2b2b1a  | T         | C       | 1     | S380,Z329                |
| 1          | 16601300 | R1b1a2a1a1c2b2b1a1 | T         | A       | 1     | S1741,Z319               |
| 1          | 8606022  | R1b1a2a1a2c1f2a1a  | A         | C       | 1     | FGC5628,Y4010            |
| 1          | 14316964 | R1b1a2a1a2c1k      | C         | G       | 1     | S730                     |
| 3A         | 21409706 | R                  | G         | C       | 1     | P227                     |
| 3A         | 22750583 | R1                 | C         | A       | 1     | M306,PF6147,S1           |
| 3A         | 7570822  | R1                 | G         | C       | 1     | P294,PF6112              |
| 3A         | 2887824  | R1b                | C         | A       | 2     | PF6242,M343              |
| 3A         | 18656508 | R1b1a              | G         | C       | 1     | PF6398,P297              |
| 3A         | 18095336 | R1b1a2             | A         | C       | 1     | CTS8591                  |
| 3A         | 22796697 | R1b1a2             | T         | C       | 1     | CTS10834                 |
| 3A         | 15037433 | R1b1a2             | C         | G       | 1     | PF6457,CTS3575           |
| 3A         | 23124367 | R1b1a2             | G         | T       | 1     | CTS11468,FGC49           |
| 3A         | 10008791 | R1b1a2             | C         | T       | 2     | PF6274.1,S351.1,L150.1   |
| 3A         | 21222868 | R1b1a2             | C         | G       | 3     | YSC0000219,PF6497        |
| 3A         | 2842212  | R1b1a2a            | T         | A       | 1     | L49.1,S349.1             |
| 3A         | 18907236 | R1b1a2a1a          | A         | C       | 1     | PF6546,S129,P310         |
| 3A         | 18248698 | R1b1a2a1a          | A         | G       | 1     | PF6545,P311,S128         |
| 3A         | 17844018 | R1b1a2a1a          | T         | C       | 2     | PF6539,L11,S127          |
| 3A         | 23612197 | R1b1a2a1a1c2b      | G         | T       | 1     | L48,S162                 |
| 3A         | 17663668 | R1b1a2a1a1c2b2b    | T         | A       | 1     | Z347                     |
| 3A         | 22023565 | R1b1a2a1a1c2b2b1a  | T         | G       | 1     | Z337                     |

|    |          |                      |   |   |   |                       |
|----|----------|----------------------|---|---|---|-----------------------|
| 3A | 16601300 | R1b1a2a1a1c2b2b1a1   | T | A | 1 | Z319,S1741            |
| 3A | 13487452 | R1b1a2a1a2c1b1b1a3a1 | T | G | 1 | BY451                 |
| 3A | 8606022  | R1b1a2a1a2c1f2a1a    | A | C | 1 | FGC5628,Y4010         |
| 3B | 14469411 | G                    | C | A | 1 | PF2951,L382,M3523     |
| 3B | 23023554 | G                    | C | A | 1 | M3618,CTS11228        |
| 3B | 23793740 | G                    | C | A | 1 | PF3122,M3628          |
| 3B | 15204710 | G                    | A | C | 1 | U21                   |
| 3B | 8231862  | G                    | G | C | 1 | M3479,PF2877          |
| 3B | 8602816  | G                    | G | C | 1 | PF2890,M3487          |
| 3B | 16203361 | G                    | G | C | 1 | M3537,CTS5317         |
| 3B | 6716150  | G                    | T | C | 1 | M3448,CTS373          |
| 3B | 7744050  | G                    | T | C | 1 | Z3192,M3468           |
| 3B | 7830068  | G                    | T | C | 1 | PF2865,M3470          |
| 3B | 14207268 | G                    | T | C | 1 | CTS2174,M3515,PF2939  |
| 3B | 17798903 | G                    | T | C | 1 | M3564,CTS8023,PF3017  |
| 3B | 9448354  | G                    | A | G | 1 | L521,F1551,PF2899     |
| 3B | 14190447 | G                    | A | G | 1 | M3511,CTS2125         |
| 3B | 7038432  | G                    | C | G | 1 | M3454,PF2847,CTS827   |
| 3B | 23343857 | G                    | C | G | 1 | M3424,PF3113,CTS11907 |
| 3B | 15204708 | G                    | T | G | 1 | L402                  |
| 3B | 2785630  | G                    | A | T | 1 | M3226,PF2782,CTS175   |
| 3B | 8600158  | G                    | A | T | 1 | M3486,PF2889          |
| 3B | 18615020 | G                    | A | T | 1 | M3567,PF3024,CTS9011  |
| 3B | 21334507 | G                    | G | T | 1 | M3582,PF3049          |
| 3B | 22714204 | G                    | G | T | 1 | CTS10706              |
| 3B | 7930724  | G                    | C | A | 2 | M3474,PF2869          |
| 3B | 2681740  | G                    | G | A | 2 | CTS34,M3442,PF2780    |
| 3B | 2795691  | G                    | G | A | 2 | CTS189,M3444          |
| 3B | 7614386  | G                    | G | A | 2 | PF2861,M3466          |
| 3B | 14432928 | G                    | G | A | 2 | PF2950,U6,P257        |
| 3B | 15693336 | G                    | G | A | 2 | CTS4523,M3311,PF2974  |
| 3B | 21412501 | G                    | G | A | 2 | M3585,PF3052          |
| 3B | 17533325 | G                    | A | C | 2 | PF3011,L522           |
| 3B | 23151673 | G                    | T | C | 2 | M3622,CTS11529        |
| 3B | 14195292 | G                    | A | G | 2 | PF2938,M3513,CTS2136  |
| 3B | 23074190 | G                    | A | G | 2 | CTS11331,M3620        |
| 3B | 21162869 | G                    | C | G | 2 | M3580,PF3046          |
| 3B | 7309873  | G                    | T | G | 2 | CTS1283,PF2855,M3461  |
| 3B | 19215139 | G                    | A | T | 2 | CTS10026,M3575,PF3037 |
| 3B | 7927218  | G                    | C | T | 2 | PF2868,M3473          |
| 3B | 8563874  | G                    | C | T | 2 | PF2888,M3485          |
| 3B | 15397649 | G                    | A | G | 4 | M3526,PF2963,CTS4101  |
| 3B | 15275200 | G                    | C | G | 4 | PF3134,U33            |
| 3B | 19124322 | G                    | A | T | 4 | PF3036,M3574,CTS9894  |
| 3B | 8121059  | G                    | G | A | 5 | PF2875,M3477          |



|           |          |                 |   |   |    |                            |
|-----------|----------|-----------------|---|---|----|----------------------------|
| <b>3B</b> | 6931141  | G               | C | G | 14 | PF2844,M3450               |
| <b>3B</b> | 15507383 | G2              | T | C | 1  | CTS4242,M3529,PF2967       |
| <b>3B</b> | 15528792 | G2              | T | C | 1  | M3530,CTS4264,PF2968       |
| <b>3B</b> | 15635425 | G2              | T | C | 1  | PF2971,M3531,CTS4413       |
| <b>3B</b> | 16903051 | G2              | A | T | 1  | PF2995,F2319,M3546,L496    |
| <b>3B</b> | 7571775  | G2              | G | T | 1  | PF2860,M3465               |
| <b>3B</b> | 17088129 | G2              | G | C | 2  | PF2999,CTS6742,M3549       |
| <b>3B</b> | 19119067 | G2              | C | T | 2  | PF3035,CTS9885,M3573       |
| <b>3B</b> | 22072097 | G2              | G | T | 2  | PF3140,P287                |
| <b>3B</b> | 21147058 | G2              | A | G | 3  | M3579,Z6103,Y346           |
| <b>3B</b> | 8545324  | G2              | T | A | 4  | M3484,F1294,PF2887         |
| <b>3B</b> | 21401188 | G2              | G | T | 4  | M3584,F3198                |
| <b>3B</b> | 23768744 | G2              | C | T | 5  | M3626,PF3120,F3536         |
| <b>3B</b> | 10060449 | G2a             | A | G | 1  | Z3240                      |
| <b>3B</b> | 17571517 | G2a             | A | G | 1  | M3348,PF3013,F2529         |
| <b>3B</b> | 23973594 | G2a             | T | G | 1  | U5,PF3141                  |
| <b>3B</b> | 21605685 | G2a             | G | C | 2  | PF3060,M3397               |
| <b>3B</b> | 17090976 | G2a             | C | T | 2  | CTS6753,PF3000,M3342       |
| <b>3B</b> | 8426380  | G2a             | T | G | 3  | L149.1                     |
| <b>3B</b> | 15615340 | G2a2            | C | G | 1  | L1259,M3308,CTS4367,PF2970 |
| <b>3B</b> | 21151007 | G2a2b           | T | C | 1  | F3139,PF3274               |
| <b>3B</b> | 13671506 | G2a2b           | G | T | 1  | Z3260                      |
| <b>3B</b> | 19461366 | G2a2b           | C | A | 4  | PF3273,M3381,CTS10449      |
| <b>3B</b> | 16197306 | G2a2b1          | A | G | 1  | M3319,S17953               |
| <b>3B</b> | 14640496 | G2a2b1          | G | T | 1  | S16240,M3295               |
| <b>3B</b> | 8519704  | G2a2b1          | G | A | 2  | M3268.1,PF3292.1           |
| <b>3B</b> | 19305343 | G2a2b1          | G | A | 4  | S22095,M3377               |
| <b>3C</b> | 21409706 | R               | G | C | 1  | P227                       |
| <b>3C</b> | 21843090 | R               | C | G | 1  | P280                       |
| <b>3C</b> | 7220727  | R1b1a2          | A | G | 1  | PF6421,YSC0000276,L773     |
| <b>6</b>  | 7570822  | R1              | G | C | 1  | PF6112,P294                |
| <b>6</b>  | 9170545  | R1b1            | C | A | 1  | M415,PF6251                |
| <b>6</b>  | 17986687 | R1b1a2          | C | A | 1  | PF6475,S17,YSC0000269      |
| <b>6</b>  | 4446430  | R1b1a2          | T | A | 1  | PF6410,M520                |
| <b>6</b>  | 7220727  | R1b1a2          | A | G | 1  | PF6421,L773,YSC0000276     |
| <b>6</b>  | 6912992  | R1b1a2          | T | G | 1  | CTS623                     |
| <b>6</b>  | 23124367 | R1b1a2          | G | T | 3  | CTS11468,FGC49             |
| <b>6</b>  | 18248698 | R1b1a2a1a       | A | G | 2  | P311,PF6545,S128           |
| <b>6</b>  | 17663668 | R1b1a2a1a1c2b2b | T | A | 1  | Z347                       |
| <b>9</b>  | 18656508 | R1b1a           | G | C | 1  | PF6398,P297                |
| <b>9</b>  | 7762947  | R1b1a2          | T | C | 1  | PF6425                     |
| <b>9</b>  | 8149348  | R1b1a2          | A | G | 1  | PF6431,L265                |
| <b>9</b>  | 22190371 | R1b1a2          | A | G | 1  | PF6509                     |
| <b>9</b>  | 15037433 | R1b1a2          | C | G | 1  | PF6457,CTS3575             |
| <b>9</b>  | 2842212  | R1b1a2a         | T | A | 1  | S349.1,L49.1               |

|            |          |                    |   |   |   |                       |
|------------|----------|--------------------|---|---|---|-----------------------|
| <b>9</b>   | 16601300 | R1b1a2a1a1c2b2b1a1 | T | A | 3 | Z319,S1741            |
| <b>9</b>   | 8606022  | R1b1a2a1a2c1f2a1a  | A | C | 1 | FGC5628,Y4010         |
| <b>10</b>  | 7570822  | R1                 | G | C | 1 | PF6112,P294           |
| <b>12A</b> | 22750583 | R1                 | C | A | 1 | S1,PF6147,M306        |
| <b>12A</b> | 18914441 | R1b1               | C | T | 2 | L278                  |
| <b>12B</b> | 19267344 | R                  | C | A | 1 | P285                  |
| <b>12B</b> | 8050994  | R                  | G | C | 1 | P229,PF6019           |
| <b>12B</b> | 21117888 | R1                 | T | C | 1 | P234                  |
| <b>12B</b> | 17782178 | R1                 | C | G | 1 | P236                  |
| <b>12B</b> | 7771131  | R1                 | G | A | 2 | P238,PF6115           |
| <b>12B</b> | 17986687 | R1b1a2             | C | A | 1 | PF6475,YSC0000269,S17 |
| <b>12B</b> | 16601300 | R1b1a2a1a1c2b2b1a1 | T | A | 1 | Z319,S1741            |
| <b>12C</b> | 19267344 | R                  | C | A | 1 | P285                  |
| <b>12C</b> | 21843090 | R                  | C | G | 1 | P280                  |
| <b>12C</b> | 17782178 | R1                 | C | G | 2 | P236                  |
| <b>12C</b> | 18095336 | R1b1a2             | A | C | 1 | CTS8591               |
| <b>12C</b> | 18381735 | R1b1a2             | A | G | 1 | YSC0000203,PF6482     |
| <b>12C</b> | 22190371 | R1b1a2             | A | G | 1 | PF6509                |
| <b>12C</b> | 6912992  | R1b1a2             | T | G | 1 | CTS623                |
| <b>12C</b> | 28590278 | R1b1a2             | G | A | 2 | CTS12478,PF6529       |
| <b>12C</b> | 8149348  | R1b1a2             | A | G | 2 | PF6431,L265           |
| <b>12C</b> | 18907236 | R1b1a2a1a          | A | C | 1 | S129,P310,PF6546      |
| <b>12C</b> | 18248698 | R1b1a2a1a          | A | G | 1 | PF6545,S128,P311      |
| <b>12C</b> | 16601300 | R1b1a2a1a1c2b2b1a1 | T | A | 1 | Z319,S1741            |

**Table S10. Sex estimates from shotgun and genome-wide capture data.** Shotgun reads\* have mapping quality above 30. †Ratio of X and Y is based on sex chromosome coverage divided by autosomal coverage on genome wide capture (fig. S4). Sex estimation of shotgun reads was also applied after PMDtools filtration (threshold 3) (table S12).

| Individual ID | Library ID | # reads sex chromosomes* | # reads on Y-chromosome* | Skoglund 95% CI | Skoglund Sex Estimate         | Xratio† | Yratio† |
|---------------|------------|--------------------------|--------------------------|-----------------|-------------------------------|---------|---------|
| <b>1</b>      | 1326       | 21561                    | 2103                     | 0.0936-0.1015   | XY                            | 0.45    | 0.55    |
| <b>2</b>      | 1327       | 139                      | 11                       | 0.0343-0.124    | consistent with XY but not XX | 0.59    | 0.8     |
| <b>3a</b>     | 1328       | 4374                     | 483                      | 0.1011-0.1197   | XY                            | 0.41    | 0.57    |
| <b>3b</b>     | 1573       | 56134                    | 6221                     | 0.1082-0.1134   | XY                            | 0.34    | 0.46    |
| <b>3c</b>     | 1330       | 3296                     | 349                      | 0.0954-0.1164   | XY                            | 0.38    | 0.53    |
| <b>4</b>      | 1331       | 5566                     | 598                      | 0.0993-0.1156   | XY                            | 0.52    | 0.4     |
| <b>5</b>      | 1332       | 91                       | 9                        | 0.0376-0.1602   | consistent with XY but not XX | 0.46    | 0.3     |
| <b>6</b>      | 1333       | 4831                     | 501                      | 0.0951-0.1123   | XY                            | 0.4     | 0.54    |
| <b>9</b>      | 1334       | 6270                     | 685                      | 0.1015-0.117    | XY                            | 0.43    | 0.59    |
| <b>10</b>     | 1575       | 1565                     | 126                      | 0.067-0.094     | consistent with XY but not XX | 0.49    | 0.72    |
| <b>12a</b>    | 1576       | 5596                     | 368                      | 0.0593-0.0723   | Not Assigned                  | 0.6     | 0.44    |
| <b>12b</b>    | 1577       | 7054                     | 664                      | 0.0873-0.1009   | XY                            | 0.46    | 0.57    |
| <b>12c</b>    | 1578       | 17144                    | 1836                     | 0.1025-0.1117   | XY                            | 0.42    | 0.58    |

**Table S11. Sex estimates from shotgun data based on Rx values.** The estimate is based on the average normalised value of X chromosome reads to the autosomes (Rx).

| Grave      | Estimate                         | Rx          | 95% CI                  | p-value  |
|------------|----------------------------------|-------------|-------------------------|----------|
| <b>1</b>   | XY                               | 0.524       | 0.4958606-<br>0.5521321 | 8.98E-13 |
| <b>2</b>   | XY                               | 0.5251<br>5 | 0.5029026-<br>0.5473961 | 1.29E-11 |
| <b>3a</b>  | XY                               | 0.4597<br>5 | 0.4329936-<br>0.486506  | 1.31E-10 |
| <b>3b</b>  | XY                               | 0.3915<br>1 | 0.3606837-<br>0.4223322 | 2.19E-08 |
| <b>3c</b>  | XY                               | 0.4225<br>9 | 0.3966302-<br>0.4485537 | 5.81E-10 |
| <b>4</b>   | XY                               | 0.4144<br>3 | 0.3837851-<br>0.4450749 | 6.22E-09 |
| <b>5</b>   | consistent with XY but not<br>XX | 0.6299<br>8 | 0.5888209-<br>0.6711337 | 2.18E-11 |
| <b>6</b>   | XY                               | 0.4497<br>6 | 0.4244624-<br>0.4750625 | 1.22E-10 |
| <b>9</b>   | XY                               | 0.4606<br>9 | 0.4379698-<br>0.4834112 | 2.02E-11 |
| <b>10</b>  | XY                               | 0.5154<br>3 | 0.4849277-<br>0.5459297 | 2.77E-12 |
| <b>12a</b> | consistent with XY but not<br>XX | 0.6102<br>1 | 0.5804894-<br>0.6399396 | 1.69E-13 |
| <b>12b</b> | XY                               | 0.5121<br>2 | 0.4858282-<br>0.5384095 | 1.38E-12 |

**12c**

XY

0.4512  
1

0.426512-  
0.475911

7.51E-11

**Table S12. Admixture CV error values for each component and individual.** K5 has the lowest estimated CV value for each individual analysed with West Eurasians (fig. S5).

| <b>Individual</b> | <b>CV error K2</b> | <b>CV error K3</b> | <b>CV error K4</b> | <b>CV error K5</b> | <b>CV error K6</b> | <b>CV error K7</b> | <b>CV error K8</b> | <b>CV error K9</b> | <b>CV error K10</b> | <b>CV error K11</b> | <b>CV error K12</b> |
|-------------------|--------------------|--------------------|--------------------|--------------------|--------------------|--------------------|--------------------|--------------------|---------------------|---------------------|---------------------|
| <b>Grave1</b>     | 0.364              | 0.362              | 0.360              | 0.360              | 0.361              | 0.361              | 0.362              | 0.362              | 0.363               | 0.363               | 0.364               |
|                   | 53                 | 32                 | 99                 | 89                 | 19                 | 78                 | 18                 | 48                 | 02                  | 67                  | 35                  |
| <b>Grave3 A</b>   | 0.364              | 0.362              | 0.360              | 0.360              | 0.361              | 0.361              | 0.361              | 0.362              | 0.363               | 0.363               | 0.364               |
|                   | 44                 | 23                 | 91                 | 81                 | 11                 | 68                 | 97                 | 38                 | 01                  | 56                  | 31                  |
| <b>Grave3 B</b>   | 0.364              | 0.362              | 0.360              | 0.360              | 0.361              | 0.361              | 0.362              | 0.362              | 0.363               | 0.363               | 0.364               |
|                   | 46                 | 25                 | 94                 | 83                 | 12                 | 7                  | 12                 | 43                 | 04                  | 55                  | 99                  |
| <b>Grave3 C</b>   | 0.364              | 0.362              | 0.360              | 0.360              | 0.361              | 0.361              | 0.362              | 0.362              | 0.362               | 0.363               | 0.364               |
|                   | 41                 | 2                  | 89                 | 79                 | 1                  | 65                 | 09                 | 37                 | 87                  | 52                  | 21                  |
| <b>Grave6</b>     | 0.364              | 0.362              | 0.360              | 0.360              | 0.361              | 0.361              | 0.362              | 0.362              | 0.363               | 0.363               | 0.364               |
|                   | 45                 | 25                 | 92                 | 83                 | 12                 | 69                 | 1                  | 43                 | 07                  | 55                  | 28                  |
| <b>Grave9</b>     | 0.364              | 0.362              | 0.360              | 0.360              | 0.361              | 0.361              | 0.362              | 0.362              | 0.363               | 0.363               | 0.364               |
|                   | 45                 | 23                 | 92                 | 82                 | 12                 | 7                  | 13                 | 39                 | 02                  | 58                  | 22                  |
| <b>Grave1 2B</b>  | 0.364              | 0.362              | 0.360              | 0.360              | 0.361              | 0.361              | 0.362              | 0.362              | 0.363               | 0.363               | 0.364               |
|                   | 45                 | 26                 | 94                 | 83                 | 13                 | 71                 | 12                 | 41                 | 03                  | 56                  | 43                  |
| <b>Grave1 2C</b>  | 0.364              | 0.362              | 0.360              | 0.360              | 0.361              | 0.361              | 0.362              | 0.362              | 0.363               | 0.363               | 0.364               |
|                   | 43                 | 23                 | 91                 | 81                 | 12                 | 68                 | 12                 | 39                 | 01                  | 48                  | 25                  |

**Table S13. Shotgun reads with PMDtools threshold 3 filtered and skoglund sex estimate of filtered reads.**

| Individual ID | #reads after deduplicated and mapping quality > 30 after PMD 3 filtration | # reads sex chromosomes | # reads on Y-chromosome | 95% CI        | Skoglund Sex estimate         |
|---------------|---------------------------------------------------------------------------|-------------------------|-------------------------|---------------|-------------------------------|
| 1             | 72215                                                                     | 1904                    | 196                     | 0.0893-0.1166 | XY                            |
| 2             | 107                                                                       | 3                       | 0                       | 0.0-0.0       | consistent with XX            |
| 3a            | 27413                                                                     | 610                     | 44                      | 0.0516-0.0927 | consistent with XY but not XX |
| 3b            | 662831                                                                    | 14363                   | 1373                    | 0.0908-0.1004 | XY                            |
| 3c            | 32246                                                                     | 699                     | 60                      | 0.0651-0.1066 | consistent with XY but not XX |
| 4             | 32257                                                                     | 668                     | 73                      | 0.0856-0.1329 | XY                            |
| 5             | 139                                                                       | 1                       | 1                       | NA            | Not assigned                  |
| 6             | 35690                                                                     | 841                     | 81                      | 0.0764-0.1163 | XY                            |
| 9             | 30262                                                                     | 751                     | 107                     | 0.1175-0.1675 | XY                            |
| 10            | 3976                                                                      | 96                      | 7                       | 0.0209-0.1249 | consistent with XY but not XX |
| 12a           | 13876                                                                     | 366                     | 34                      | 0.0632-0.1226 | consistent with XY but not XX |
| 12b           | 11315                                                                     | 305                     | 30                      | 0.0649-0.1318 | consistent with XY but not XX |
| 12c           | 117703                                                                    | 2904                    | 277                     | 0.0847-0.1061 | XY                            |

**Table S14. Haplogroup calling of selected individuals before and after PMD (threshold 3) filtering.** The selected individuals had Schmutzi contamination estimates above 5%.

| <b>Sequence id</b> | <b>Haplogroup</b> | <b>Haplogroup after PMD filtering</b> |
|--------------------|-------------------|---------------------------------------|
| <b>2</b>           | K1a1b2a1a         | K1a1b2a1a                             |
| <b>10</b>          | H1b               | H1b                                   |
| <b>12a</b>         | H10e1             | H10                                   |



**Table S15. READ pairwise kinship-based estimate.** The Z scores are significantly diverged from 0 to strongly support authenticity, except for pairs 1/12B and 6/9. All 1240K captured SNPs were used for kinship estimate.

| Pair 1 | Pair 2 | Relationship  | Z upper | Z lower | Normalized 2 Allele Difference | Standard Error | NonNormalized P0 |
|--------|--------|---------------|---------|---------|--------------------------------|----------------|------------------|
| 1      | 6      | First Degree  | 6.77    | -19.36  | 0.761                          | 0.006          | 0.195            |
| 1      | 3A     | First Degree  | 10.50   | -15.26  | 0.739                          | 0.006          | 0.189            |
| 9      | 1      | First Degree  | 9.76    | -14.49  | 0.740                          | 0.006          | 0.189            |
| 9      | 12B    | First Degree  | 4.12    | -8.82   | 0.752                          | 0.012          | 0.193            |
| 9      | 3A     | First Degree  | 9.65    | -13.05  | 0.736                          | 0.007          | 0.188            |
| 1      | 12B    | Second Degree | 1.23    | -10.94  | 0.890                          | 0.008          | 0.228            |
| 9      | 6      | Second Degree | 1.15    | -10.32  | 0.890                          | 0.009          | 0.228            |
| 3A     | 6      | Second Degree | 5.69    | -9.61   | 0.863                          | 0.007          | 0.221            |
| 3A     | 12B    | Second Degree | 2.60    | -8.76   | 0.877                          | 0.009          | 0.225            |
| 1      | 12C    | Unrelated     | NA      | -16.83  | 1.006                          | 0.006          | 0.258            |
| 1      | 3B     | Unrelated     | NA      | -18.62  | 1.000                          | 0.005          | 0.256            |
| 1      | 3C     | Unrelated     | NA      | -12.47  | 0.980                          | 0.006          | 0.251            |
| 6      | 12B    | Unrelated     | NA      | -4.72   | 0.949                          | 0.010          | 0.243            |
| 6      | 12C    | Unrelated     | NA      | -15.59  | 1.013                          | 0.007          | 0.259            |
| 6      | 3B     | Unrelated     | NA      | -16.88  | 1.001                          | 0.006          | 0.256            |
| 9      | 12C    | Unrelated     | NA      | -12.24  | 1.009                          | 0.009          | 0.258            |
| 9      | 3B     | Unrelated     | NA      | -15.48  | 1.005                          | 0.007          | 0.257            |
| 9      | 3C     | Unrelated     | NA      | -9.56   | 0.993                          | 0.010          | 0.254            |
| 12B    | 12C    | Unrelated     | NA      | -10.62  | 1.013                          | 0.011          | 0.259            |
| 3A     | 12C    | Unrelated     | NA      | -16.16  | 1.005                          | 0.006          | 0.257            |
| 3A     | 3B     | Unrelated     | NA      | -17.97  | 1.000                          | 0.006          | 0.256            |
| 3A     | 3C     | Unrelated     | NA      | -4.56   | 0.930                          | 0.007          | 0.238            |
| 3B     | 12B    | Unrelated     | NA      | -14.85  | 1.018                          | 0.008          | 0.261            |
| 3B     | 12C    | Unrelated     | NA      | -17.82  | 1.006                          | 0.006          | 0.258            |
| 3C     | 6      | Unrelated     | NA      | -12.33  | 1.001                          | 0.008          | 0.256            |
| 3C     | 12B    | Unrelated     | NA      | -9.59   | 1.012                          | 0.012          | 0.259            |
| 3C     | 12C    | Unrelated     | NA      | -15.26  | 1.023                          | 0.008          | 0.262            |
| 3C     | 3B     | Unrelated     | NA      | -16.31  | 1.002                          | 0.006          | 0.256            |

**Table S16. Pairwise estimate of kinship and coefficient of relatedness.** Estimate is based on Kennett *et al* 2017.

| ID1      | ID2      | #SNPs overlapping | #Mismatches | Proportion of mismatches (P0) | Coefficient of relatedness | Relationship  |
|----------|----------|-------------------|-------------|-------------------------------|----------------------------|---------------|
| Grave1   | Grave3A  | 285346            | 54510       | 0.19103                       | 0.558807997                | First Degree  |
| Grave9   | Grave1   | 118115            | 22601       | 0.19135                       | 0.556393814                | First Degree  |
| Grave9   | Grave3A  | 100883            | 19319       | 0.1915                        | 0.555262165                | First Degree  |
| Grave1   | Grave6   | 197511            | 38804       | 0.19647                       | 0.51776688                 | First Degree  |
| Grave9   | Grave12B | 27938             | 5498        | 0.19679                       | 0.515352697                | First Degree  |
| Grave3A  | Grave6   | 174743            | 38926       | 0.22276                       | 0.319426631                | Second Degree |
| Grave3A  | Grave12B | 66876             | 15043       | 0.22494                       | 0.302980008                | Second Degree |
| Grave1   | Grave12B | 78614             | 17825       | 0.22674                       | 0.289400226                | Second Degree |
| Grave9   | Grave6   | 70465             | 16109       | 0.22861                       | 0.275292343                | Second Degree |
| Grave3A  | Grave3C  | 129922            | 31517       | 0.24258                       | 0.169898152                | unrelated     |
| Grave6   | Grave12B | 46674             | 11397       | 0.24418                       | 0.157827235                | unrelated     |
| Grave1   | Grave3C  | 138996            | 35537       | 0.25567                       | 0.071142965                | unrelated     |
| Grave9   | Grave3C  | 50198             | 12917       | 0.25732                       | 0.058694832                | unrelated     |
| Grave3C  | Grave6   | 89662             | 23267       | 0.2595                        | 0.042248208                | unrelated     |
| Grave9   | Grave12C | 64558             | 16756       | 0.25955                       | 0.041870992                | unrelated     |
| Grave1   | Grave12C | 180095            | 46823       | 0.25999                       | 0.03855149                 | unrelated     |
| Grave3C  | Grave12B | 33417             | 8688        | 0.25999                       | 0.03855149                 | unrelated     |
| Grave6   | Grave3B  | 245013            | 63709       | 0.26002                       | 0.03832516                 | unrelated     |
| Grave1   | Grave3B  | 388706            | 101077      | 0.26003                       | 0.038249717                | unrelated     |
| Grave3A  | Grave12C | 160450            | 41783       | 0.26041                       | 0.035382874                | unrelated     |
| Grave3B  | Grave12B | 91422             | 23815       | 0.2605                        | 0.034703885                | unrelated     |
| Grave9   | Grave3B  | 138630            | 36117       | 0.26053                       | 0.034477556                | unrelated     |
| Grave3A  | Grave3B  | 348063            | 90705       | 0.2606                        | 0.033949453                | unrelated     |
| Grave12B | Grave12C | 42973             | 11206       | 0.26077                       | 0.032666918                | unrelated     |
| Grave3C  | Grave3B  | 182862            | 47938       | 0.26215                       | 0.022255753                | unrelated     |
| Grave3B  | Grave12C | 225813            | 59320       | 0.2627                        | 0.018106375                | unrelated     |
| Grave6   | Grave12C | 113175            | 29785       | 0.26318                       | 0.0144851                  | unrelated     |
| Grave3C  | Grave12C | 82593             | 21896       | 0.26511                       | -7.54432E-05               | unrelated     |
